# Supplementary material for: Predicting Cross-Species Infection of Swine Influenza Virus with Representation Learning of Amino Acid Features
Source: Hindawi journal article supplement (doi:10.1155/2021/6985008), 2021-10-11
Supplement: f1 [file 6985008.f1.pdf]

| ID             | Nomenclature                            | Subtype | Phenotype |
|----------------|-----------------------------------------|---------|-----------|
| EPI_ISL_218602 | A/swine/Dong_Nai/12-04-3/2015           | H3N2    | Negative  |
| EPI_ISL_285477 | A/swine/Nebraska/A02221499/2017         | H3N2    | Negative  |
| EPI_ISL_195196 | A/swine/Spain/16677/2011                | H3N2    | Negative  |
| EPI_ISL_200850 | A/swine/Kentucky/14TOSU23948/2014       | H3N2    | Negative  |
| EPI_ISL_196018 | A/swine/Mexico/9783350/2013             | H3N2    | Negative  |
| EPI_ISL_150703 | A/swine/Texas/SG1186/2004               | H3N2    | Negative  |
| EPI_ISL_190476 | A/swine/North_Carolina/A02077505/2015   | H3N2    | Negative  |
| EPI_ISL_208064 | A/swine/Manitoba/D0379/2015             | H3N2    | Negative  |
| EPI_ISL_155800 | A/swine/Nebraska/A01409647/2013         | H3N2    | Negative  |
| EPI_ISL_243765 | A/swine/Ohio/14TOSU0306/2014            | H3N2    | Negative  |
| EPI_ISL_28431  | A/swine/Ratchaburi/NIAH59/2004          | H3N2    | Negative  |
| EPI_ISL_296391 | A/swine/Iowa/A02135000/2017             | H3N2    | Negative  |
| EPI_ISL_243776 | A/swine/Kentucky/15TOSU18783/2015       | H3N2    | Negative  |
| EPI_ISL_218603 | A/swine/Dong_Nai/12-06-3/2015           | H3N2    | Negative  |
| EPI_ISL_278827 | A/swine/Italy/248147-8/2015             | H3N2    | Negative  |
| EPI_ISL_127928 | A/swine/Illinois/A00857318a/2012        | H3N2    | Negative  |
| EPI_ISL_218287 | A/swine/Dong_Nai/08-16-1/2015/pAEpC1    | H3N2    | Negative  |
| EPI_ISL_116352 | A/swine/Minnesota/A01076701/2010        | H3N2    | Negative  |
| EPI_ISL_168295 | A/swine/Indiana/13TOSU5869/2013         | H3N2    | Negative  |
| EPI_ISL_218539 | A/swine/Bac_Ninh/40-17-3/2015           | H3N2    | Negative  |
| EPI_ISL_104803 | A/swine/Minnesota/A01076196/2010        | H3N2    | Negative  |
| EPI_ISL_311325 | A/swine/Ohio/OH-18-7965/2018            | H3N2    | Negative  |
| EPI_ISL_205322 | A/swine/Missouri/A01795668/2015         | H3N2    | Negative  |
| EPI_ISL_271066 | A/swine/South_Dakota/MT_12_07_1554/2012 | H3N2    | Negative  |
| EPI_ISL_218541 | A/swine/Bac_Ninh/40-19-3/2015           | H3N2    | Negative  |
| EPI_ISL_282519 | A/swine/Manitoba/D0423/2016             | H3N2    | Negative  |
| EPI_ISL_218294 | A/swine/Dong_Nai/08-27-1/2015           | H3N2    | Negative  |
| EPI_ISL_206672 | A/swine/Indiana/A01260976/2015          | H3N2    | Negative  |
| EPI_ISL_29807  | A/swine/Minnesota/761/2007              | H3N2    | Negative  |
| EPI_ISL_151160 | A/swine/Manitoba/SG1438/2011            | H3N2    | Negative  |
| EPI_ISL_282538 | A/swine/British_Columbia/SD0132/2016    | H3N2    | Negative  |
| EPI_ISL_218578 | A/swine/Bac_Ninh/43-06-3/2015           | H3N2    | Negative  |
| EPI_ISL_150397 | A/swine/Indiana/A00968325/2010          | H3N2    | Negative  |
| EPI_ISL_87551  | A/swine/Pennsylvania/057108-1/2010      | H3N2    | Negative  |
| EPI_ISL_26009  | A/swine/Nordkirchen/IDT1993/2003        | H3N2    | Negative  |
| EPI_ISL_24590  | A/swine/Korea/CY10/2007                 | H3N2    | Negative  |
| EPI_ISL_218047 | A/swine/Dong_Nai/09-06-1/2014           | H3N2    | Negative  |
| EPI_ISL_104647 | A/swine/North_Carolina/A01076178/2009   | H3N2    | Negative  |
| EPI_ISL_162014 | A/swine/Indiana/A00968344/2011          | H3N2    | Negative  |
| EPI_ISL_271065 | A/swine/Iowa/MT_12_07_4286/2012         | H3N2    | Negative  |
| EPI_ISL_282737 | A/swine/Manitoba/D0414/2015             | H3N2    | Negative  |
| EPI_ISL_102558 | A/swine/Indiana/A01049349/2010          | H3N2    | Negative  |
| EPI_ISL_195989 | A/swine/Mexico/7773583/2010             | H3N2    | Negative  |
| EPI_ISL_207872 | A/swine/Manitoba/D0320/2014             | H3N2    | Negative  |
| EPI_ISL_127584 | A/swine/Illinois/A01240575/2011         | H3N2    | Negative  |
| EPI_ISL_278920 | A/swine/Italy/319159-3/2010             | H3N2    | Negative  |
| EPI_ISL_116349 | A/swine/Iowa/A01076311/2010             | H3N2    | Negative  |
| EPI_ISL_278804 | A/swine/Quebec/1557833/2013             | H3N2    | Negative  |
| EPI_ISL_195204 | A/swine/England/502321/1994             | H3N2    | Negative  |
| EPI_ISL_174307 | A/swine/Arkansas/A01555090/2014         | H3N2    | Negative  |
| EPI_ISL_207099 | A/swine/Manitoba/D0260/2013             | H3N2    | Negative  |
| EPI_ISL_207033 | A/swine/Manitoba/D0091/2012             | H3N2    | Negative  |
| EPI_ISL_256258 | A/swine/Florida/A01104089/2015          | H3N2    | Negative  |
| EPI_ISL_243787 | A/swine/Iowa/A01781973/2016             | H3N2    | Negative  |
| EPI_ISL_133383 | A/swine/Germany/R83/2011                | H3N2    | Negative  |
| EPI_ISL_195197 | A/swine/Spain/18512/2011                | H3N2    | Negative  |
| EPI_ISL_151261 | A/swine/North_Carolina/SG1462/2004      | H3N2    | Negative  |

|                |                                       |      |          |
|----------------|---------------------------------------|------|----------|
| EPI_ISL_161643 | A/swine/Bac_Ninh/159/2012             | H3N2 | Negative |
| EPI_ISL_24588  | A/swine/Korea/CY07/2007               | H3N2 | Negative |
| EPI_ISL_161660 | A/swine/Bac_Ninh/386/2012             | H3N2 | Negative |
| EPI_ISL_84913  | A/swine/Italy/1850/1977               | H3N2 | Negative |
| EPI_ISL_138209 | A/swine/Iowa/A01432395/2013           | H3N2 | Negative |
| EPI_ISL_266544 | A/swine/Iowa/A01667087/2017           | H3N2 | Negative |
| EPI_ISL_167331 | A/swine/Kansas/A01477353/2014         | H3N2 | Negative |
| EPI_ISL_256555 | A/swine/Illinois/A01672426/2017       | H3N2 | Negative |
| EPI_ISL_218600 | A/swine/Dong_Nai/12-02-3/2015         | H3N2 | Negative |
| EPI_ISL_252709 | A/swine/Iowa/A01776537/2016           | H3N2 | Negative |
| EPI_ISL_256260 | A/swine/Indiana/A01812059/2015        | H3N2 | Negative |
| EPI_ISL_195190 | A/swine/Belgium/Izegem-538/2010       | H3N2 | Negative |
| EPI_ISL_24589  | A/swine/Korea/CY09/2007               | H3N2 | Negative |
| EPI_ISL_116394 | A/swine/Illinois/A01047014/2010       | H3N2 | Negative |
| EPI_ISL_142019 | A/swine/Wyoming/A01379327/2013        | H3N2 | Negative |
| EPI_ISL_236810 | A/swine/Indiana/A01812151/2016        | H3N2 | Negative |
| EPI_ISL_142643 | A/Swine/Spain/80598LP1/2007           | H3N2 | Negative |
| EPI_ISL_29102  | A/swine/Bissendorf/IDT1864/03         | H3N2 | Negative |
| EPI_ISL_104805 | A/swine/North_Carolina/A01076204/2010 | H3N2 | Negative |
| EPI_ISL_156335 | A/swine/Indiana/A00968359/2012        | H3N2 | Negative |
| EPI_ISL_116350 | A/swine/Iowa/A01076630/2010           | H3N2 | Negative |
| EPI_ISL_161143 | A/swine/Ohio/13TOSU2052/2013          | H3N2 | Negative |
| EPI_ISL_278821 | A/swine/Korea/S2001/2015              | H3N2 | Negative |
| EPI_ISL_207050 | A/swine/Manitoba/D0102/2012           | H3N2 | Negative |
| EPI_ISL_93359  | A/swine/Minnesota/A01049346/2010      | H3N2 | Negative |
| EPI_ISL_207875 | A/swine/Saskatchewan/SD0025/2014      | H3N2 | Negative |
| EPI_ISL_164477 | A/swine/DongNai/10-12-1/2013          | H3N2 | Negative |
| EPI_ISL_261508 | A/swine/Illinois/16TOSU7168/2016      | H3N2 | Negative |
| EPI_ISL_278437 | A/swine/Oklahoma/A02218159/2017       | H3N2 | Negative |
| EPI_ISL_133356 | A/swine/Germany/R2807/2009            | H3N2 | Negative |
| EPI_ISL_257035 | A/swine/Indiana/A01672517/2017        | H3N2 | Negative |
| EPI_ISL_29806  | A/swine/Minnesota/578/2007            | H3N2 | Negative |
| EPI_ISL_151252 | A/swine/South_Dakota/SG1453/2003      | H3N2 | Negative |
| EPI_ISL_218289 | A/swine/Dong_Nai/08-20-1/2015         | H3N2 | Negative |
| EPI_ISL_127707 | A/swine/Indiana/A01203372/2012        | H3N2 | Negative |
| EPI_ISL_180673 | A/swine/Missouri/A01840324/2015       | H3N2 | Negative |
| EPI_ISL_207170 | A/swine/Saskatchewan/SD0012/2013      | H3N2 | Negative |
| EPI_ISL_124340 | A/swine/Illinois/A01076724/2010       | H3N2 | Negative |
| EPI_ISL_282460 | A/swine/Manitoba/D0471/2016           | H3N2 | Negative |
| EPI_ISL_195191 | A/swine/Belgium/Valdegem-581/2010     | H3N2 | Negative |
| EPI_ISL_124402 | A/swine/Iowa/A01076508/2010           | H3N2 | Negative |
| EPI_ISL_142215 | A/swine/Korea/KSB/2012                | H3N2 | Negative |
| EPI_ISL_271043 | A/swine/Iowa/MT_12_07_1931/2012       | H3N2 | Negative |
| EPI_ISL_278922 | A/swine/Italy/171855/2011             | H3N2 | Negative |
| EPI_ISL_211812 | A/swine/Illinois/A01728585/2015       | H3N2 | Negative |
| EPI_ISL_282692 | A/swine/Alberta/SD0123/2015           | H3N2 | Negative |
| EPI_ISL_278844 | A/swine/Italy/1103/2015               | H3N2 | Negative |
| EPI_ISL_133680 | A/swine/Iowa/A01277915/2012           | H3N2 | Negative |
| EPI_ISL_282481 | A/swine/Alberta/SD0186/2016           | H3N2 | Negative |
| EPI_ISL_272738 | A/swine/Kansas/A01378025/2017         | H3N2 | Negative |
| EPI_ISL_222495 | A/swine/Illinois/A01894510/2016       | H3N2 | Negative |
| EPI_ISL_282713 | A/swine/Saskatchewan/SD0100/2015      | H3N2 | Negative |
| EPI_ISL_134279 | A/swine/Michigan/A01259002/2012       | H3N2 | Negative |
| EPI_ISL_161427 | A/swine/Bac_Ninh/118/2012             | H3N2 | Negative |
| EPI_ISL_235750 | A/swine/North_Carolina/A01732564/2016 | H3N2 | Negative |
| EPI_ISL_297066 | A/swine/Iowa/A02134994/2017           | H3N2 | Negative |
| EPI_ISL_13217  | A/Swine/Shandong/3/2005/              | H3N2 | Negative |
| EPI_ISL_134301 | A/swine/North_Carolina/A01442548/2012 | H3N2 | Negative |

|                |                                          |      |          |
|----------------|------------------------------------------|------|----------|
| EPI_ISL_130016 | A/swine/Illinois/A01327868/2012          | H3N2 | Negative |
| EPI_ISL_218291 | A/swine/Dong_Nai/08-22-1/2015            | H3N2 | Negative |
| EPI_ISL_124404 | A/swine/Minnesota/A01076531/2010         | H3N2 | Negative |
| EPI_ISL_281244 | A/swine/Saskatchewan/SD0069/2015         | H3N2 | Negative |
| EPI_ISL_130053 | A/swine/Illinois/A01241208/2012          | H3N2 | Negative |
| EPI_ISL_282405 | A/swine/Iowa/A02219788/2017              | H3N2 | Negative |
| EPI_ISL_161429 | A/swine/Bac_Ninh/144/2012                | H3N2 | Negative |
| EPI_ISL_90102  | A/swine/Iowa/A01049034/2010              | H3N2 | Negative |
| EPI_ISL_136652 | A/swine/Maryland/A01444460/2013          | H3N2 | Negative |
| EPI_ISL_296676 | A/swine/North_Carolina/A02223299/2017    | H3N2 | Negative |
| EPI_ISL_161426 | A/swine/Bac_Ninh/116/2012                | H3N2 | Negative |
| EPI_ISL_282459 | A/swine/Alberta/SD0197/2016              | H3N2 | Negative |
| EPI_ISL_282479 | A/swine/Manitoba/D0459/2016              | H3N2 | Negative |
| EPI_ISL_234530 | A/swine/North_Carolina/A01777989/2016    | H3N2 | Negative |
| EPI_ISL_297150 | A/swine/Ohio/16TOSU3157/2016             | H3N2 | Negative |
| EPI_ISL_213796 | A/swine/Iowa/A01729543/2016              | H3N2 | Negative |
| EPI_ISL_282400 | A/swine/North_Carolina/A02219753/2017    | H3N2 | Negative |
| EPI_ISL_96932  | A/swine/Minnesota/001444/2007            | H3N2 | Negative |
| EPI_ISL_129533 | A/swine/Spain/82108/2007                 | H3N2 | Negative |
| EPI_ISL_13923  | A/swine/Nakhon_pathom/NIAH586-1/2005     | H3N2 | Negative |
| EPI_ISL_206373 | A/swine/Indiana/A01812022/2015           | H3N2 | Negative |
| EPI_ISL_195221 | A/swine/Spain/31768/2012                 | H3N2 | Negative |
| EPI_ISL_116356 | A/swine/Nebraska/A01116980/2011          | H3N2 | Negative |
| EPI_ISL_160794 | A/swine/DongNai/07-17-1/2012             | H3N2 | Negative |
| EPI_ISL_180672 | A/swine/Illinois/A01840351/2015          | H3N2 | Negative |
| EPI_ISL_133354 | A/swine/Germany/R325/2009                | H3N2 | Negative |
| EPI_ISL_195192 | A/swine/Netherlands/Roosendaal-571/2011  | H3N2 | Negative |
| EPI_ISL_207045 | A/swine/Manitoba/D0098/2012              | H3N2 | Negative |
| EPI_ISL_161152 | A/swine/Indiana/13TOSU1207/2013          | H3N2 | Negative |
| EPI_ISL_124310 | A/swine/Iowa/A01202657/2011              | H3N2 | Negative |
| EPI_ISL_262591 | A/swine/Iowa/A01667095/2017              | H3N2 | Negative |
| EPI_ISL_271725 | A/swine/Minnesota/MT_12_07_11_3_27/2011  | H3N2 | Negative |
| EPI_ISL_144533 | A/swine/Illinois/A01271617/2012          | H3N2 | Negative |
| EPI_ISL_174302 | A/swine/Arkansas/A01840027/2014          | H3N2 | Negative |
| EPI_ISL_130131 | A/swine/Iowa/A01300194/2012              | H3N2 | Negative |
| EPI_ISL_195193 | A/swine/Belgium/Moorslede-515/2011       | H3N2 | Negative |
| EPI_ISL_136563 | A/swine/Michigan/A01432375/2013          | H3N2 | Negative |
| EPI_ISL_67909  | A/swine/Guangdong/111/2002               | H3N2 | Negative |
| EPI_ISL_282729 | A/swine/Saskatchewan/SD0097/2015         | H3N2 | Negative |
| EPI_ISL_222484 | A/swine/North_Carolina/A01894277/2016    | H3N2 | Negative |
| EPI_ISL_195217 | A/swine/Belgium/Belsele-66/2013          | H3N2 | Negative |
| EPI_ISL_157605 | A/swine/Iowa/13G060/2013                 | H3N2 | Negative |
| EPI_ISL_278856 | A/swine/Italy/341031-3/2014              | H3N2 | Negative |
| EPI_ISL_151290 | A/swine/North_Carolina/01216/2006        | H3N2 | Negative |
| EPI_ISL_280163 | A/swine/Kansas/A01378028/2017            | H3N2 | Negative |
| EPI_ISL_151619 | A/swine/Missouri/00355/2004              | H3N2 | Negative |
| EPI_ISL_234244 | A/swine/Indiana/A01812202/2016           | H3N2 | Negative |
| EPI_ISL_24584  | A/swine/Korea/CAS07/2005                 | H3N2 | Negative |
| EPI_ISL_271662 | A/swine/Iowa/MT_12_07_4307/2012          | H3N2 | Negative |
| EPI_ISL_195185 | A/swine/Germany/Stadtloder-IDT11945/2010 | H3N2 | Negative |
| EPI_ISL_132356 | A/swine/Iowa/A01203943/2012              | H3N2 | Negative |
| EPI_ISL_281252 | A/swine/Saskatchewan/SD0026/2014         | H3N2 | Negative |
| EPI_ISL_161186 | A/swine/Ohio/13TOSU2132/2013             | H3N2 | Negative |
| EPI_ISL_281954 | A/swine/Minnesota/MT_13_01_S63/2013      | H3N2 | Negative |
| EPI_ISL_166548 | A/swine/Nebraska/A01476165/2014          | H3N2 | Negative |
| EPI_ISL_252781 | A/swine/Minnesota/A01668936/2016         | H3N2 | Negative |
| EPI_ISL_198367 | A/swine/Nebraska/A02034991/2015          | H3N2 | Negative |
| EPI_ISL_102531 | A/swine/Iowa/A01202659/2011              | H3N2 | Negative |

|                |                                                |      |          |
|----------------|------------------------------------------------|------|----------|
| EPI_ISL_211815 | A/swine/Illinois/A01728293/2015                | H3N2 | Negative |
| EPI_ISL_163049 | A/swine/DongNai/07-08-2/2013                   | H3N2 | Negative |
| EPI_ISL_195184 | A/swine/Germany/Ottendorf-IDT11910/2010        | H3N2 | Negative |
| EPI_ISL_151640 | A/swine/Alabama/SG1224/2005                    | H3N2 | Negative |
| EPI_ISL_245065 | A/swine/North_Dakota/A01782435/2016            | H3N2 | Negative |
| EPI_ISL_284679 | A/swine/Texas/A01785299/2017                   | H3N2 | Negative |
| EPI_ISL_282707 | A/swine/Alberta/SD0109/2015                    | H3N2 | Negative |
| EPI_ISL_13899  | A/swine/Guangdong/166/06                       | H3N2 | Negative |
| EPI_ISL_243373 | A/swine/North_Carolina/A01781199/2016          | H3N2 | Negative |
| EPI_ISL_260821 | A/swine/Iowa/A01932578/2017                    | H3N2 | Negative |
| EPI_ISL_195201 | A/swine/Spain/29403/2012                       | H3N2 | Negative |
| EPI_ISL_296261 | A/swine/North_Carolina/A02135886/2017          | H3N2 | Negative |
| EPI_ISL_216893 | A/swine/North_Carolina/A01730588/2016          | H3N2 | Negative |
| EPI_ISL_282731 | A/swine/Saskatchewan/SD0067/2015               | H3N2 | Negative |
| EPI_ISL_150829 | A/swine/Oklahoma/SG1216/2005                   | H3N2 | Negative |
| EPI_ISL_208970 | A/swine/North_Carolina/A01797711/2015          | H3N2 | Negative |
| EPI_ISL_218292 | A/swine/Dong_Nai/08-25-1/2015                  | H3N2 | Negative |
| EPI_ISL_235742 | A/swine/North_Carolina/A01732322/2016          | H3N2 | Negative |
| EPI_ISL_161151 | A/swine/Indiana/13TOSU1217/2013                | H3N2 | Negative |
| EPI_ISL_282454 | A/swine/Alberta/SD0208/2016                    | H3N2 | Negative |
| EPI_ISL_237042 | A/swine/Nebraska/A01781225/2016                | H3N2 | Negative |
| EPI_ISL_234572 | A/swine/Iowa/A01732489/2016                    | H3N2 | Negative |
| EPI_ISL_243756 | A/swine/Ohio/14TOSU0294/2014                   | H3N2 | Negative |
| EPI_ISL_129504 | A/swine/England/87842/1990                     | H3N2 | Negative |
| EPI_ISL_130130 | A/swine/Iowa/A01300451/2012                    | H3N2 | Negative |
| EPI_ISL_278810 | A/swine/Quebec/1708732/2015                    | H3N2 | Negative |
| EPI_ISL_205064 | A/swine/Illinois/A01944946/2015                | H3N2 | Negative |
| EPI_ISL_116359 | A/swine/Pennsylvania/A01201666/2011            | H3N2 | Negative |
| EPI_ISL_195219 | A/swine/Spain/33936/2012                       | H3N2 | Negative |
| EPI_ISL_207966 | A/swine/Saskatchewan/SD0041/2014               | H3N2 | Negative |
| EPI_ISL_282691 | A/swine/British_Columbia/SD0122/2015           | H3N2 | Negative |
| EPI_ISL_161668 | A/swine/DongNai/07-29-1/2012                   | H3N2 | Negative |
| EPI_ISL_203176 | A/swine/Iowa/A01944136/2015                    | H3N2 | Negative |
| EPI_ISL_63633  | A/swine/Oklahoma/011506/2007                   | H3N2 | Negative |
| EPI_ISL_234956 | A/swine/North_Carolina/A01777729/2016          | H3N2 | Negative |
| EPI_ISL_195215 | A/swine/Germany/Coesfeld-Harle-IDT14741-1/2012 | H3N2 | Negative |
| EPI_ISL_24586  | A/swine/Korea/CY04/2007                        | H3N2 | Negative |
| EPI_ISL_200878 | A/swine/Kentucky/14TOSU23816/2014              | H3N2 | Negative |
| EPI_ISL_282464 | A/swine/Manitoba/D0475/2016                    | H3N2 | Negative |
| EPI_ISL_168340 | A/swine/Indiana/13TOSU5095/2013                | H3N2 | Negative |
| EPI_ISL_29805  | A/swine/Minnesota/66960/2006                   | H3N2 | Negative |
| EPI_ISL_209376 | A/swine/Iowa/A01727249/2015                    | H3N2 | Negative |
| EPI_ISL_225508 | A/swine/North_Carolina/A01895828/2016          | H3N2 | Negative |
| EPI_ISL_129523 | A/swine/Italy/15360-3/2001                     | H3N2 | Negative |
| EPI_ISL_282473 | A/swine/Manitoba/D0467/2016                    | H3N2 | Negative |
| EPI_ISL_5141   | A/swine/Spain/33601/2001                       | H3N2 | Negative |
| EPI_ISL_124343 | A/swine/Minnesota/A01201424/2010               | H3N2 | Negative |
| EPI_ISL_207967 | A/swine/Manitoba/D0354/2014                    | H3N2 | Negative |
| EPI_ISL_168507 | A/swine/Kansas/A01377371/2014                  | H3N2 | Negative |
| EPI_ISL_155696 | A/swine/Nebraska/A01409533/2013                | H3N2 | Negative |
| EPI_ISL_230187 | A/swine/Missouri/A01775853/2016                | H3N2 | Negative |
| EPI_ISL_130179 | A/swine/South_Dakota/A01300602/2012            | H3N2 | Negative |
| EPI_ISL_134289 | A/swine/Illinois/A01244402/2012                | H3N2 | Negative |
| EPI_ISL_282724 | A/swine/Manitoba/SD0085/2015                   | H3N2 | Negative |
| EPI_ISL_138597 | A/swine/HuNan/01/2008                          | H3N2 | Negative |
| EPI_ISL_203185 | A/swine/Ohio/A01944458/2015                    | H3N2 | Negative |
| EPI_ISL_271646 | A/swine/Iowa/MT_12_07_1912/2012                | H3N2 | Negative |
| EPI_ISL_143878 | A/swine/Wyoming/A01381213/2013                 | H3N2 | Negative |

|                |                                             |      |          |
|----------------|---------------------------------------------|------|----------|
| EPI_ISL_128163 | A/swine/Mexico/Mex51/2010                   | H3N2 | Negative |
| EPI_ISL_218611 | A/swine/Dong_Nai/12-14-3/2015               | H3N2 | Negative |
| EPI_ISL_129520 | A/swine/Gent/96/2007                        | H3N2 | Negative |
| EPI_ISL_128940 | A/Swine/Spain/SF32071/2007                  | H3N2 | Negative |
| EPI_ISL_282470 | A/swine/Manitoba/D0464/2016                 | H3N2 | Negative |
| EPI_ISL_278799 | A/swine/Quebec/1698182/2014                 | H3N2 | Negative |
| EPI_ISL_151212 | A/swine/Mexico/SG1444/2011                  | H3N2 | Negative |
| EPI_ISL_278848 | A/swine/Italy/23398/2015                    | H3N2 | Negative |
| EPI_ISL_218052 | A/swine/Dong_Nai/09-15-1/2014               | H3N2 | Negative |
| EPI_ISL_208655 | A/Swine/Cambodia/TangKrang/060301/2011/H3N2 | H3N2 | Negative |
| EPI_ISL_188905 | A/swine/South_Dakota/A01847612/2015         | H3N2 | Negative |
| EPI_ISL_329654 | A/swine/Ohio/OH-18-6906/2018                | H3N2 | Negative |
| EPI_ISL_195182 | A/swine/Belgium/Gent-131/2000               | H3N2 | Negative |
| EPI_ISL_271738 | A/swine/Iowa/MT_12_07_3836/2012             | H3N2 | Negative |
| EPI_ISL_218569 | A/swine/Bac_Ninh/43-20-3/2015               | H3N2 | Negative |
| EPI_ISL_151350 | A/swine/Texas/SG1501/2010                   | H3N2 | Negative |
| EPI_ISL_282723 | A/swine/Manitoba/SD0084/2015                | H3N2 | Negative |
| EPI_ISL_124437 | A/swine/Illinois/A01116190/2011             | H3N2 | Negative |
| EPI_ISL_134284 | A/swine/Iowa/A01432207/2012                 | H3N2 | Negative |
| EPI_ISL_207035 | A/swine/Manitoba/D0092/2012                 | H3N2 | Negative |
| EPI_ISL_207984 | A/swine/Saskatchewan/SD0065/2014            | H3N2 | Negative |
| EPI_ISL_148312 | A/swine/Virginia/A01290329/2013             | H3N2 | Negative |
| EPI_ISL_130117 | A/swine/Nebraska/A01300022/2012             | H3N2 | Negative |
| EPI_ISL_207038 | A/swine/Manitoba/D0095/2012                 | H3N2 | Negative |
| EPI_ISL_216894 | A/swine/Indiana/A01730580/2016              | H3N2 | Negative |
| EPI_ISL_151253 | A/swine/Nebraska/00188/2003                 | H3N2 | Negative |
| EPI_ISL_129506 | A/swine/England/90591/1997                  | H3N2 | Negative |
| EPI_ISL_207049 | A/swine/Manitoba/D0100/2012                 | H3N2 | Negative |
| EPI_ISL_278869 | A/swine/Italy/134414/2014                   | H3N2 | Negative |
| EPI_ISL_218606 | A/swine/Dong_Nai/12-09-3/2015               | H3N2 | Negative |
| EPI_ISL_207057 | A/swine/Manitoba/D0106/2012                 | H3N2 | Negative |
| EPI_ISL_280197 | A/swine/Indiana/16TOSU4637/2016             | H3N2 | Negative |
| EPI_ISL_109922 | A/swine/Iowa/A01202088/2011                 | H3N2 | Negative |
| EPI_ISL_207964 | A/swine/Alberta/SD0038/2014                 | H3N2 | Negative |
| EPI_ISL_151209 | A/swine/Saskatchewan/SD0001/2011            | H3N2 | Negative |
| EPI_ISL_127727 | A/swine/Iowa/A01243311/2012                 | H3N2 | Negative |
| EPI_ISL_280242 | A/swine/Kentucky/16TOSU5910/2016            | H3N2 | Negative |
| EPI_ISL_129582 | A/swine/Wisconsin/H02AS8/2002               | H3N2 | Negative |
| EPI_ISL_207059 | A/swine/Manitoba/D0177/2012                 | H3N2 | Negative |
| EPI_ISL_218607 | A/swine/Dong_Nai/12-10-3/2015               | H3N2 | Negative |
| EPI_ISL_188904 | A/swine/Missouri/A01847626/2015             | H3N2 | Negative |
| EPI_ISL_151273 | A/swine/North_Carolina/01052/2006           | H3N2 | Negative |
| EPI_ISL_151636 | A/swine/North_Carolina/00116/2003           | H3N2 | Negative |
| EPI_ISL_282715 | A/swine/Alberta/SD0101/2015                 | H3N2 | Negative |
| EPI_ISL_127730 | A/swine/Iowa/A01049119/2010                 | H3N2 | Negative |
| EPI_ISL_329655 | A/swine/Ohio/OH-18-6910/2018                | H3N2 | Negative |
| EPI_ISL_151287 | A/swine/Texas/00816/2005                    | H3N2 | Negative |
| EPI_ISL_84915  | A/swine/Italy/6/1981                        | H3N2 | Negative |
| EPI_ISL_271644 | A/swine/Minnesota/MT_12_07_540/2012         | H3N2 | Negative |
| EPI_ISL_222527 | A/swine/Illinois/A01895671/2016             | H3N2 | Negative |
| EPI_ISL_151272 | A/swine/North_Carolina/01506/2006           | H3N2 | Negative |
| EPI_ISL_148108 | A/swine/Guangdong/L23/2010                  | H3N2 | Negative |
| EPI_ISL_102544 | A/swine/Iowa/A01202709/2011                 | H3N2 | Negative |
| EPI_ISL_179622 | A/swine/Missouri/A01554378/2015             | H3N2 | Negative |
| EPI_ISL_6908   | A/swine/Spain/42386/2002                    | H3N2 | Negative |
| EPI_ISL_150841 | A/swine/North_Carolina/01312/2006           | H3N2 | Negative |
| EPI_ISL_245076 | A/swine/Iowa/A01782576/2016                 | H3N2 | Negative |
| EPI_ISL_207920 | A/swine/Manitoba/D0340/2014                 | H3N2 | Negative |

|                |                                             |      |          |
|----------------|---------------------------------------------|------|----------|
| EPI_ISL_200086 | A/swine/Oklahoma/A01770191/2015             | H3N2 | Negative |
| EPI_ISL_207143 | A/swine/Manitoba/D0281/2013                 | H3N2 | Negative |
| EPI_ISL_271639 | A/swine/Minnesota/MT_12_07_11_3_4/2011      | H3N2 | Negative |
| EPI_ISL_282720 | A/swine/Manitoba/D0430/2015                 | H3N2 | Negative |
| EPI_ISL_117563 | A/swine/Illinois/A00857304b/2012            | H3N2 | Negative |
| EPI_ISL_237047 | A/swine/Minnesota/A01781044/2016            | H3N2 | Negative |
| EPI_ISL_278797 | A/swine/Quebec/1561816/2014                 | H3N2 | Negative |
| EPI_ISL_167970 | A/swine/Nebraska/A01565757/2014             | H3N2 | Negative |
| EPI_ISL_218609 | A/swine/Dong_Nai/12-12-3/2015               | H3N2 | Negative |
| EPI_ISL_218050 | A/swine/Dong_Nai/09-13-1/2014               | H3N2 | Negative |
| EPI_ISL_271736 | A/swine/Minnesota/MT_12_07_1654/2012        | H3N2 | Negative |
| EPI_ISL_161641 | A/swine/Bac_Ninh/155/2012                   | H3N2 | Negative |
| EPI_ISL_124046 | A/swine/Michigan/A01203498/2012             | H3N2 | Negative |
| EPI_ISL_97111  | A/swine/Nebraska/A01049937/2011             | H3N2 | Negative |
| EPI_ISL_282545 | A/swine/Saskatchewan/SD0149/2016            | H3N2 | Negative |
| EPI_ISL_195994 | A/swine/Mexico/8630459/2011                 | H3N2 | Negative |
| EPI_ISL_205067 | A/swine/Iowa/A01795793/2015                 | H3N2 | Negative |
| EPI_ISL_195198 | A/swine/Spain/28778/2012                    | H3N2 | Negative |
| EPI_ISL_90366  | A/swine/Iowa/A01049160/2010                 | H3N2 | Negative |
| EPI_ISL_208657 | A/Swine/Cambodia/Chranieng/200503/2012/H3N2 | H3N2 | Negative |
| EPI_ISL_129481 | A/swine/England/375017/1993                 | H3N2 | Negative |
| EPI_ISL_84917  | A/swine/Brabant/1984                        | H3N2 | Negative |
| EPI_ISL_229216 | A/swine/North_Carolina/A01776152/2016       | H3N2 | Negative |
| EPI_ISL_151604 | A/swine/Texas/00226/2003                    | H3N2 | Negative |
| EPI_ISL_278887 | A/swine/Italy/352498/2013                   | H3N2 | Negative |
| EPI_ISL_278824 | A/swine/Italy/229049/2015                   | H3N2 | Negative |
| EPI_ISL_271083 | A/swine/South_Dakota/MT_12_07_1566/2012     | H3N2 | Negative |
| EPI_ISL_133006 | A/swine/Minnesota/A01271731/2012            | H3N2 | Negative |
| EPI_ISL_278803 | A/swine/Quebec/1626561/2014                 | H3N2 | Negative |
| EPI_ISL_203105 | A/swine/North_Carolina/A01945726/2015       | H3N2 | Negative |
| EPI_ISL_282491 | A/swine/Alberta/SD0181/2016                 | H3N2 | Negative |
| EPI_ISL_96934  | A/swine/Minnesota/001332/2006               | H3N2 | Negative |
| EPI_ISL_280240 | A/swine/Indiana/16TOSU7610/2016             | H3N2 | Negative |
| EPI_ISL_109876 | A/swine/Minnesota/A01047396/2011            | H3N2 | Negative |
| EPI_ISL_207969 | A/swine/Saskatchewan/SD0045/2014            | H3N2 | Negative |
| EPI_ISL_218605 | A/swine/Dong_Nai/12-08-3/2015               | H3N2 | Negative |
| EPI_ISL_207145 | A/swine/Manitoba/D0283/2013                 | H3N2 | Negative |
| EPI_ISL_151608 | A/swine/Oklahoma/00141/2003                 | H3N2 | Negative |
| EPI_ISL_133484 | A/swine/Germany/R655/2012                   | H3N2 | Negative |
| EPI_ISL_124246 | A/swine/Illinois/A01240578/2011             | H3N2 | Negative |
| EPI_ISL_10148  | A/swine/Manitoba/12707/2005                 | H3N2 | Negative |
| EPI_ISL_282520 | A/swine/Manitoba/SD0151/2016                | H3N2 | Negative |
| EPI_ISL_246038 | A/swine/North_Carolina/A01668240/2016       | H3N2 | Negative |
| EPI_ISL_218044 | A/swine/Dong_Nai/09-02-1/2014               | H3N2 | Negative |
| EPI_ISL_191504 | A/swine/Iowa/A02077646/2015                 | H3N2 | Negative |
| EPI_ISL_88842  | A/swine/Minnesota/239105/2009               | H3N2 | Negative |
| EPI_ISL_162562 | A/swine/Nebraska/A01493915/2014             | H3N2 | Negative |
| EPI_ISL_207072 | A/swine/Manitoba/D0083/2013                 | H3N2 | Negative |
| EPI_ISL_161434 | A/swine/Bac_Ninh/150/2012                   | H3N2 | Negative |
| EPI_ISL_151613 | A/swine/Nebraska/SG1178/2003                | H3N2 | Negative |
| EPI_ISL_13896  | A/swine/Heilongjiang/1/05                   | H3N2 | Negative |
| EPI_ISL_13925  | A/swine/Ratchaburi/NIAH874/2005             | H3N2 | Negative |
| EPI_ISL_24582  | A/swine/Korea/CAS05/2004                    | H3N2 | Negative |
| EPI_ISL_130038 | A/swine/Minnesota/A01327764/2012            | H3N2 | Negative |
| EPI_ISL_207116 | A/swine/Manitoba/D0271/2013                 | H3N2 | Negative |
| EPI_ISL_218241 | A/swine/Bac_Ninh/251/2015                   | H3N2 | Negative |
| EPI_ISL_133360 | A/swine/Germany/R494/2010                   | H3N2 | Negative |
| EPI_ISL_109911 | A/swine/Iowa/A01049033/2010                 | H3N2 | Negative |

|                |                                         |      |          |
|----------------|-----------------------------------------|------|----------|
| EPI_ISL_218286 | A/swine/Dong_Nai/08-16-1/2015           | H3N2 | Negative |
| EPI_ISL_150942 | A/swine/Texas/03042/2010                | H3N2 | Negative |
| EPI_ISL_271058 | A/swine/South_Dakota/MT_12_07_2008/2012 | H3N2 | Negative |
| EPI_ISL_282735 | A/swine/Alberta/SD0079/2015             | H3N2 | Negative |
| EPI_ISL_174304 | A/swine/Arkansas/A01555074/2014         | H3N2 | Negative |
| EPI_ISL_208981 | A/swine/Ohio/A01796509/2015             | H3N2 | Negative |
| EPI_ISL_133903 | A/swine/Ohio/11SW170/2011               | H3N2 | Negative |
| EPI_ISL_195211 | A/swine/Belgium/Glabbeek-284/2012       | H3N2 | Negative |
| EPI_ISL_278913 | A/swine/Italy/337155/2012               | H3N2 | Negative |
| EPI_ISL_237045 | A/swine/Minnesota/A01781222/2016        | H3N2 | Negative |
| EPI_ISL_200089 | A/swine/North_Carolina/A01770073/2015   | H3N2 | Negative |
| EPI_ISL_282447 | A/swine/Manitoba/D0476/2016             | H3N2 | Negative |
| EPI_ISL_207071 | A/swine/Manitoba/D0195/2013             | H3N2 | Negative |
| EPI_ISL_271055 | A/swine/Minnesota/MT_12_07_1647/2012    | H3N2 | Negative |
| EPI_ISL_282700 | A/swine/Saskatchewan/SD0118/2015        | H3N2 | Negative |
| EPI_ISL_180661 | A/swine/Nebraska/A01567868/2015         | H3N2 | Negative |
| EPI_ISL_28430  | A/swine/Udon_Thani/NIAH464/2004         | H3N2 | Negative |
| EPI_ISL_195195 | A/swine/Netherlands/Vragender-503/2011  | H3N2 | Negative |
| EPI_ISL_151020 | A/swine/Saskatchewan/02903/2009         | H3N2 | Negative |
| EPI_ISL_296547 | A/swine/Ohio/A02134225/2017             | H3N2 | Negative |
| EPI_ISL_225563 | A/swine/North_Carolina/A01894904/2016   | H3N2 | Negative |
| EPI_ISL_226067 | A/swine/Colorado/A01775092/2016         | H3N2 | Negative |
| EPI_ISL_282696 | A/swine/Manitoba/SD0131/2015            | H3N2 | Negative |
| EPI_ISL_235739 | A/swine/Minnesota/A01942325/2016        | H3N2 | Negative |
| EPI_ISL_328758 | A/swine/Indiana/17TOSU1833/2017         | H3N2 | Negative |
| EPI_ISL_124472 | A/swine/Nebraska/A01116984/2011         | H3N2 | Negative |
| EPI_ISL_278875 | A/swine/Italy/91602/2014                | H1N2 | Negative |
| EPI_ISL_74387  | A/swine/Hong_Kong/NS1889/2009           | H1N2 | Negative |
| EPI_ISL_133788 | A/swine/Ohio/09SW1478M/2009             | H1N2 | Negative |
| EPI_ISL_207968 | A/swine/Alberta/SD0042/2014             | H1N2 | Negative |
| EPI_ISL_203138 | A/swine/Illinois/A01944807/2015         | H1N2 | Negative |
| EPI_ISL_119366 | A/swine/Minnesota/A01201429/2011        | H1N2 | Negative |
| EPI_ISL_137561 | A/swine/Missouri/A01444795/2013         | H1N2 | Negative |
| EPI_ISL_211799 | A/swine/Oklahoma/A01728097/2015         | H1N2 | Negative |
| EPI_ISL_297193 | A/swine/Indiana/A02136747/2017          | H1N2 | Negative |
| EPI_ISL_29767  | A/swine/Hong_Kong/NS623/2002            | H1N2 | Negative |
| EPI_ISL_29770  | A/swine/Hong_Kong/1110/2006             | H1N2 | Negative |
| EPI_ISL_208920 | A/swine/North_Carolina/A01796370/2015   | H1N2 | Negative |
| EPI_ISL_88360  | A/swine/Hong_Kong/1111/2004             | H1N2 | Negative |
| EPI_ISL_142741 | A/swine/Korea/CY0423-33/2013            | H1N2 | Negative |
| EPI_ISL_280233 | A/swine/Indiana/16TOSU8165/2016         | H1N2 | Negative |
| EPI_ISL_253710 | A/swine/Iowa/A01671477/2016             | H1N2 | Negative |
| EPI_ISL_218582 | A/swine/Dong_Nai/07-05-3/2015           | H1N2 | Negative |
| EPI_ISL_97075  | A/swine/Iowa/A01049723/2011             | H1N2 | Negative |
| EPI_ISL_151193 | A/swine/Oklahoma/01117/2006             | H1N2 | Negative |
| EPI_ISL_205043 | A/swine/North_Carolina/A01945949/2015   | H1N2 | Negative |
| EPI_ISL_261488 | A/swine/Iowa/A01932577/2017             | H1N2 | Negative |
| EPI_ISL_88840  | A/swine/North_Carolina/226126/2010      | H1N2 | Negative |
| EPI_ISL_222687 | A/swine/Indiana/A01894974/2016          | H1N2 | Negative |
| EPI_ISL_130144 | A/swine/Illinois/A01328923/2012         | H1N2 | Negative |
| EPI_ISL_96982  | A/swine/Guangdong/2676/2010             | H1N2 | Negative |
| EPI_ISL_157196 | A/swine/Missouri/A01411322/2014         | H1N2 | Negative |
| EPI_ISL_119350 | A/swine/Minnesota/A01134353/2011        | H1N2 | Negative |
| EPI_ISL_212193 | A/swine/Nebraska/A01941775/2016         | H1N2 | Negative |
| EPI_ISL_151278 | A/swine/Arkansas/02927/2009             | H1N2 | Negative |
| EPI_ISL_278895 | A/swine/Italy/87434/2014                | H1N2 | Negative |
| EPI_ISL_150839 | A/swine/Texas/SG1250/2006               | H1N2 | Negative |
| EPI_ISL_150985 | A/swine/North_Carolina/SG1365/2010      | H1N2 | Negative |

|                |                                         |      |          |
|----------------|-----------------------------------------|------|----------|
| EPI_ISL_219062 | A/swine/Dong_Nai/07-23-3/2015           | H1N2 | Negative |
| EPI_ISL_246032 | A/swine/Iowa/A01668210/2016             | H1N2 | Negative |
| EPI_ISL_13920  | A/swine/Saraburi/NIAH13021/2005         | H1N2 | Negative |
| EPI_ISL_282453 | A/swine/Manitoba/SD0209/2016            | H1N2 | Negative |
| EPI_ISL_124488 | A/swine/Illinois/A01134580/2011         | H1N2 | Negative |
| EPI_ISL_282523 | A/swine/Saskatchewan/SD0155/2016        | H1N2 | Negative |
| EPI_ISL_218284 | A/swine/Dong_Nai/07-27-1/2015           | H1N2 | Negative |
| EPI_ISL_211825 | A/swine/North_Carolina/A01728820/2015   | H1N2 | Negative |
| EPI_ISL_194997 | A/swine/Germany/Steinfeld-IDT12115/2010 | H1N2 | Negative |
| EPI_ISL_180662 | A/swine/Minnesota/A01567956/2014        | H1N2 | Negative |
| EPI_ISL_195100 | A/swine/Denmark/10345-1/2012            | H1N2 | Negative |
| EPI_ISL_258654 | A/swine/South_Carolina/A01932046/2017   | H1N2 | Negative |
| EPI_ISL_119337 | A/swine/Minnesota/A01076209/2010        | H1N2 | Negative |
| EPI_ISL_130123 | A/swine/Nebraska/A01300150/2012         | H1N2 | Negative |
| EPI_ISL_88355  | A/swine/Hong_Kong/NS30/2004             | H1N2 | Negative |
| EPI_ISL_200093 | A/swine/North_Carolina/A02076945/2015   | H1N2 | Negative |
| EPI_ISL_9882   | A/swine/Ontario/48235/04                | H1N2 | Negative |
| EPI_ISL_160437 | A/swine/DongNai/03-03-2/2011            | H1N2 | Negative |
| EPI_ISL_278899 | A/swine/Italy/327669/2013               | H1N2 | Negative |
| EPI_ISL_79311  | A/swine/Germany-NI/R757/10              | H1N2 | Negative |
| EPI_ISL_217471 | A/swine/Illinois/A01731417/2016         | H1N2 | Negative |
| EPI_ISL_207233 | A/swine/Italy/9529-70/2013              | H1N2 | Negative |
| EPI_ISL_95878  | A/swine/Italy/18/2000                   | H1N2 | Negative |
| EPI_ISL_234287 | A/swine/North_Carolina/A01777394/2016   | H1N2 | Negative |
| EPI_ISL_218592 | A/swine/Dong_Nai/07-21-3/2015           | H1N2 | Negative |
| EPI_ISL_234240 | A/swine/Indiana/A01812236/2016          | H1N2 | Negative |
| EPI_ISL_11923  | A/swine/Guangxi/13/2006                 | H1N2 | Negative |
| EPI_ISL_262594 | A/swine/Pennsylvania/A01933903/2017     | H1N2 | Negative |
| EPI_ISL_100195 | A/swine/Ohio/FAH10-1/2010               | H1N2 | Negative |
| EPI_ISL_151294 | A/swine/Oklahoma/01382/2006             | H1N2 | Negative |
| EPI_ISL_195459 | A/swine/Missouri/A02076915/2015         | H1N2 | Negative |
| EPI_ISL_95863  | A/swine/Italy/4675/2003                 | H1N2 | Negative |
| EPI_ISL_328824 | A/swine/Chile/39/2014                   | H1N2 | Negative |
| EPI_ISL_207232 | A/swine/Italy/9529-1/2013               | H1N2 | Negative |
| EPI_ISL_124394 | A/swine/North_Carolina/A01076202/2010   | H1N2 | Negative |
| EPI_ISL_218593 | A/swine/Dong_Nai/07-22-3/2015           | H1N2 | Negative |
| EPI_ISL_245062 | A/swine/South_Carolina/A01782474/2016   | H1N2 | Negative |
| EPI_ISL_256560 | A/swine/Iowa/A01672419/2017             | H1N2 | Negative |
| EPI_ISL_253645 | A/swine/Michigan/A01671231/2016         | H1N2 | Negative |
| EPI_ISL_4666   | A/swine/Bakum/1832/2000                 | H1N2 | Negative |
| EPI_ISL_74371  | A/swine/Hong_Kong/1435/2009             | H1N2 | Negative |
| EPI_ISL_234579 | A/swine/Indiana/A01778367/2016          | H1N2 | Negative |
| EPI_ISL_195069 | A/swine/France/CotesdArmor-0074/2011    | H1N2 | Negative |
| EPI_ISL_222696 | A/swine/Illinois/A01895418/2016         | H1N2 | Negative |
| EPI_ISL_29772  | A/swine/Hong_Kong/915/2004              | H1N2 | Negative |
| EPI_ISL_195057 | A/swine/Spain/24237/2011                | H1N2 | Negative |
| EPI_ISL_195114 | A/swine/England/463180/1994             | H1N2 | Negative |
| EPI_ISL_218057 | A/swine/Tien_Giang/08-12-1/2014         | H1N2 | Negative |
| EPI_ISL_243775 | A/swine/Indiana/15TOSU4060/2015         | H1N2 | Negative |
| EPI_ISL_212200 | A/swine/Iowa/A01729216/2016             | H1N2 | Negative |
| EPI_ISL_236808 | A/swine/North_Carolina/A01732706/2016   | H1N2 | Negative |
| EPI_ISL_285337 | A/swine/Missouri/A02221494/2017         | H1N2 | Negative |
| EPI_ISL_234951 | A/swine/Iowa/A01777667/2016             | H1N2 | Negative |
| EPI_ISL_174440 | A/swine/Minnesota/A01567012/2014        | H1N2 | Negative |
| EPI_ISL_282406 | A/swine/Iowa/A02219785/2017             | H1N2 | Negative |
| EPI_ISL_243357 | A/swine/Iowa/A01781147/2016             | H1N2 | Negative |
| EPI_ISL_136651 | A/swine/Illinois/A01444513/2013         | H1N2 | Negative |
| EPI_ISL_129508 | A/swine/England/P185/2008               | H1N2 | Negative |

|                |                                       |      |          |
|----------------|---------------------------------------|------|----------|
| EPI_ISL_285479 | A/swine/Oklahoma/A02221360/2017       | H1N2 | Negative |
| EPI_ISL_263483 | A/swine/Indiana/16TOSU0646/2016       | H1N2 | Negative |
| EPI_ISL_218283 | A/swine/Dong_Nai/07-26-1/2015         | H1N2 | Negative |
| EPI_ISL_129452 | A/swine/England/002295/2002           | H1N2 | Negative |
| EPI_ISL_29768  | A/swine/Hong_Kong/78/2003             | H1N2 | Negative |
| EPI_ISL_161119 | A/swine/Texas/13TOSU6276/2013         | H1N2 | Negative |
| EPI_ISL_278858 | A/swine/Italy/352331/2014             | H1N2 | Negative |
| EPI_ISL_129530 | A/swine/Ploufragan/0214/2006          | H1N2 | Negative |
| EPI_ISL_281988 | A/swine/Oklahoma/A02219505/2017       | H1N2 | Negative |
| EPI_ISL_129489 | A/swine/England/448813/1994           | H1N2 | Negative |
| EPI_ISL_63211  | A/swine/Texas/050593/2008             | H1N2 | Negative |
| EPI_ISL_278923 | A/swine/Italy/229537/2011             | H1N2 | Negative |
| EPI_ISL_203097 | A/swine/Iowa/A01795483/2015           | H1N2 | Negative |
| EPI_ISL_271726 | A/swine/Minnesota/MT_12_07_2130/2012  | H1N2 | Negative |
| EPI_ISL_129513 | A/swine/Cotes_d'Armor/1174/2009       | H1N2 | Negative |
| EPI_ISL_170574 | A/swine/North_Carolina/A01476787/2014 | H1N2 | Negative |
| EPI_ISL_150990 | A/swine/Arkansas/SG1377/2011          | H1N2 | Negative |
| EPI_ISL_235732 | A/swine/Illinois/A01778711/2016       | H1N2 | Negative |
| EPI_ISL_222483 | A/swine/North_Carolina/A01894401/2016 | H1N2 | Negative |
| EPI_ISL_164462 | A/swine/DongNai/03-17-2/2011          | H1N2 | Negative |
| EPI_ISL_119368 | A/swine/North_Carolina/A01076192/2010 | H1N2 | Negative |
| EPI_ISL_161136 | A/swine/Ohio/13TOSU0558/2013          | H1N2 | Negative |
| EPI_ISL_129493 | A/swine/England/60797/2000            | H1N2 | Negative |
| EPI_ISL_278854 | A/swine/Italy/334694-1/2014           | H1N2 | Negative |
| EPI_ISL_328785 | A/swine/Rancagua/VN1401-143/2014      | H1N2 | Negative |
| EPI_ISL_119343 | A/swine/Minnesota/A01076998/2010      | H1N2 | Negative |
| EPI_ISL_129802 | A/swine/Oklahoma/A01203865/2012       | H1N2 | Negative |
| EPI_ISL_218325 | A/swine/Dong_Nai/08-22-2/2015/pAEpC1  | H1N2 | Negative |
| EPI_ISL_129488 | A/swine/England/43142/2001            | H1N2 | Negative |
| EPI_ISL_151623 | A/swine/North_Carolina/SG1232/2005    | H1N2 | Negative |
| EPI_ISL_150988 | A/swine/Arkansas/SG1375/2011          | H1N2 | Negative |
| EPI_ISL_119348 | A/swine/Minnesota/A01134236/2011      | H1N2 | Negative |
| EPI_ISL_136649 | A/swine/Minnesota/A01444719/2013      | H1N2 | Negative |
| EPI_ISL_206452 | A/swine/Wisconsin/A01104088/2015      | H1N2 | Negative |
| EPI_ISL_182281 | A/swine/Oklahoma/A01566774/2014       | H1N2 | Negative |
| EPI_ISL_278839 | A/swine/Italy/73436/2015              | H1N2 | Negative |
| EPI_ISL_216999 | A/swine/North_Carolina/A01729907/2016 | H1N2 | Negative |
| EPI_ISL_150885 | A/swine/Minnesota/01604/2007          | H1N2 | Negative |
| EPI_ISL_221738 | A/swine/Illinois/A01733826/2016       | H1N2 | Negative |
| EPI_ISL_278880 | A/swine/Italy/125010-1/2014           | H1N2 | Negative |
| EPI_ISL_131141 | A/swine/Illinois/A01301796/2012       | H1N2 | Negative |
| EPI_ISL_142644 | A/Swine/Spain/SF12091/2007            | H1N2 | Negative |
| EPI_ISL_79309  | A/swine/Germany-NI/R299/09            | H1N2 | Negative |
| EPI_ISL_119332 | A/swine/Iowa/A01076186/2010           | H1N2 | Negative |
| EPI_ISL_130052 | A/swine/Illinois/A01240830/2011       | H1N2 | Negative |
| EPI_ISL_257156 | A/swine/North_Carolina/A01672582/2017 | H1N2 | Negative |
| EPI_ISL_262600 | A/swine/Iowa/A01667086/2017           | H1N2 | Negative |
| EPI_ISL_278838 | A/swine/Italy/65210/2015              | H1N2 | Negative |
| EPI_ISL_245590 | A/swine/North_Carolina/A01668056/2016 | H1N2 | Negative |
| EPI_ISL_207230 | A/swine/Italy/50206-21/2014           | H1N2 | Negative |
| EPI_ISL_207956 | A/swine/Manitoba/D0342/2014           | H1N2 | Negative |
| EPI_ISL_142645 | A/Swine/Spain/80598LP4/2007           | H1N2 | Negative |
| EPI_ISL_161145 | A/swine/Indiana/13TOSU1058/2013       | H1N2 | Negative |
| EPI_ISL_74377  | A/swine/Hong_Kong/2314/2009           | H1N2 | Negative |
| EPI_ISL_153757 | A/swine/North_Carolina/A01290777/2013 | H1N2 | Negative |
| EPI_ISL_97097  | A/swine/Iowa/A01049645/2011           | H1N2 | Negative |
| EPI_ISL_218055 | A/swine/Tien_Giang/08-10-1/2014       | H1N2 | Negative |
| EPI_ISL_195008 | A/swine/France/Morbihan-0213/2011     | H1N2 | Negative |

|                |                                            |      |          |
|----------------|--------------------------------------------|------|----------|
| EPI_ISL_253709 | A/swine/Pennsylvania/A01671487/2016        | H1N2 | Negative |
| EPI_ISL_124484 | A/swine/Minnesota/A01134468/2011           | H1N2 | Negative |
| EPI_ISL_150997 | A/swine/North_Carolina/SG1388/2011         | H1N2 | Negative |
| EPI_ISL_151180 | A/swine/North_Carolina/SG1394/2011         | H1N2 | Negative |
| EPI_ISL_260805 | A/swine/Indiana/A01932256/2017             | H1N2 | Negative |
| EPI_ISL_150932 | A/swine/Kentucky/02564/2009                | H1N2 | Negative |
| EPI_ISL_129532 | A/swine/Spain/40564/2002                   | H1N2 | Negative |
| EPI_ISL_129450 | A/swine/England/00003/2009                 | H1N2 | Negative |
| EPI_ISL_129917 | A/swine/North_Carolina/A01270393/2011      | H1N2 | Negative |
| EPI_ISL_218324 | A/swine/Dong_Nai/08-22-2/2015              | H1N2 | Negative |
| EPI_ISL_243785 | A/swine/North_Carolina/A01782003/2016      | H1N2 | Negative |
| EPI_ISL_195065 | A/swine/Netherlands/Lievelde-511/2011      | H1N2 | Negative |
| EPI_ISL_207960 | A/swine/Manitoba/D0348/2014                | H1N2 | Negative |
| EPI_ISL_243755 | A/swine/Indiana/14TOSU6438/2014            | H1N2 | Negative |
| EPI_ISL_162584 | A/swine/Kansas/A01377287/2014              | H1N2 | Negative |
| EPI_ISL_129491 | A/swine/England/483/2006                   | H1N2 | Negative |
| EPI_ISL_281248 | A/swine/Manitoba/D0392/2015                | H1N2 | Negative |
| EPI_ISL_282514 | A/swine/Alberta/SD0164/2016                | H1N2 | Negative |
| EPI_ISL_161654 | A/swine/Bac_Ninh/347/2012                  | H1N2 | Negative |
| EPI_ISL_151257 | A/swine/Oklahoma/00259/2004                | H1N2 | Negative |
| EPI_ISL_127746 | A/swine/Iowa/A01202083/2011                | H1N2 | Negative |
| EPI_ISL_235790 | A/swine/North_Carolina/A01778770/2016      | H1N2 | Negative |
| EPI_ISL_256251 | A/swine/Indiana/A01812062/2015             | H1N2 | Negative |
| EPI_ISL_281303 | A/swine/North_Carolina/A02218894/2017      | H1N2 | Negative |
| EPI_ISL_198366 | A/swine/South_Dakota/A02025413/2015        | H1N2 | Negative |
| EPI_ISL_151249 | A/swine/Colorado/02875/2009                | H1N2 | Negative |
| EPI_ISL_153730 | A/swine/Kansas/A01290646/2013              | H1N2 | Negative |
| EPI_ISL_278912 | A/swine/Italy/337085/2012                  | H1N2 | Negative |
| EPI_ISL_205518 | A/swine/Pennsylvania/A02035484/2015        | H1N2 | Negative |
| EPI_ISL_195003 | A/swine/Germany/Nikolausdorf-IDT12279/2010 | H1N2 | Negative |
| EPI_ISL_225506 | A/swine/North_Carolina/A01894897/2016      | H1N2 | Negative |
| EPI_ISL_235793 | A/swine/Iowa/A01778876/2016                | H1N2 | Negative |
| EPI_ISL_234673 | A/swine/Iowa/A01777892/2016                | H1N2 | Negative |
| EPI_ISL_207229 | A/swine/Italy/50064-3/2014                 | H1N2 | Negative |
| EPI_ISL_153862 | A/swine/Nebraska/A01104071/2013            | H1N2 | Negative |
| EPI_ISL_296421 | A/swine/Iowa/A02221865/2017                | H1N2 | Negative |
| EPI_ISL_127813 | A/swine/Iowa/A01202809/2011                | H1N2 | Negative |
| EPI_ISL_218585 | A/swine/Dong_Nai/07-11-3/2015              | H1N2 | Negative |
| EPI_ISL_195117 | A/swine/England/1437/2004                  | H1N2 | Negative |
| EPI_ISL_203174 | A/swine/North_Carolina/A01944409/2015      | H1N2 | Negative |
| EPI_ISL_218588 | A/swine/Dong_Nai/07-14-3/2015              | H1N2 | Negative |
| EPI_ISL_254685 | A/swine/Nebraska/A01672049/2017            | H1N2 | Negative |
| EPI_ISL_252699 | A/swine/Colorado/A01668653/2016            | H1N2 | Negative |
| EPI_ISL_195012 | A/swine/France/IlleetVilaine-0415/2011     | H1N2 | Negative |
| EPI_ISL_282912 | A/swine/Illinois/A02219794/2017            | H1N2 | Negative |
| EPI_ISL_24578  | A/swine/Korea/PZ4/2006                     | H1N2 | Negative |
| EPI_ISL_140964 | A/swine/Nebraska/A01443969/2013            | H1N2 | Negative |
| EPI_ISL_212187 | A/swine/Nebraska/A01941636/2015            | H1N2 | Negative |
| EPI_ISL_173750 | A/swine/Oklahoma/A01567187/2014            | H1N2 | Negative |
| EPI_ISL_163190 | A/swine/TienGiang/01-30-1/2012             | H1N2 | Negative |
| EPI_ISL_218326 | A/swine/Dong_Nai/08-29-2/2015              | H1N2 | Negative |
| EPI_ISL_207046 | A/swine/Manitoba/D0364/2012                | H1N2 | Negative |
| EPI_ISL_150995 | A/swine/Virginia/SG1386/2011               | H1N2 | Negative |
| EPI_ISL_127770 | A/swine/Oklahoma/A01202498/2011            | H1N2 | Negative |
| EPI_ISL_24574  | A/swine/Korea/JL01/2005                    | H1N2 | Negative |
| EPI_ISL_203109 | A/swine/North_Carolina/A01945748/2015      | H1N2 | Negative |
| EPI_ISL_163045 | A/swine/DongNai/07-19-2/2013               | H1N2 | Negative |
| EPI_ISL_177503 | A/swine/Minnesota/01082/2006               | H1N2 | Negative |

|                |                                           |      |          |
|----------------|-------------------------------------------|------|----------|
| EPI_ISL_222479 | A/swine/Nebraska/A01894200/2016           | H1N2 | Negative |
| EPI_ISL_278832 | A/swine/Italy/187946/2015                 | H1N2 | Negative |
| EPI_ISL_119341 | A/swine/Minnesota/A01076763/2010          | H1N2 | Negative |
| EPI_ISL_135961 | A/swine/Michigan/A01259001/2012           | H1N2 | Negative |
| EPI_ISL_218321 | A/swine/Dong_Nai/08-13-2/2015             | H1N2 | Negative |
| EPI_ISL_129484 | A/swine/England/40280/1996                | H1N2 | Negative |
| EPI_ISL_129497 | A/swine/England/645913/1996               | H1N2 | Negative |
| EPI_ISL_145690 | A/swine/North_Carolina/A01432952/2013     | H1N2 | Negative |
| EPI_ISL_278865 | A/swine/Italy/302073/2014                 | H1N2 | Negative |
| EPI_ISL_95876  | A/swine/Italy/233139/2005                 | H1N2 | Negative |
| EPI_ISL_195081 | A/swine/England/997/2008                  | H1N2 | Negative |
| EPI_ISL_12996  | A/swine/Cloppenburg/IDT4777/2005          | H1N2 | Negative |
| EPI_ISL_245071 | A/swine/Kansas/A01782583/2016             | H1N2 | Negative |
| EPI_ISL_97138  | A/swine/Iowa/A01049765/2011               | H1N2 | Negative |
| EPI_ISL_163048 | A/swine/DongNai/07-10-2/2013              | H1N2 | Negative |
| EPI_ISL_88371  | A/swine/Hong_Kong/69/2006                 | H1N2 | Negative |
| EPI_ISL_9879   | A/swine/Ontario/55383/04                  | H1N2 | Negative |
| EPI_ISL_195002 | A/swine/Germany/Barle-IDT13149/2011       | H1N2 | Negative |
| EPI_ISL_278873 | A/swine/Italy/166277-2/2014               | H1N2 | Negative |
| EPI_ISL_195183 | A/swine/Netherlands/Wanroij-CVI2117A/2012 | H1N2 | Negative |
| EPI_ISL_328812 | A/swine/Chile/VN1401-274/2014             | H1N2 | Negative |
| EPI_ISL_258614 | A/swine/Illinois/A01672615/2017           | H1N2 | Negative |
| EPI_ISL_218303 | A/swine/Dong_Nai/09-30-1/2015/pAEpC1      | H1N2 | Negative |
| EPI_ISL_132825 | A/swine/Korea/VDS2/2009                   | H1N2 | Negative |
| EPI_ISL_195113 | A/swine/Spain/29262/2012                  | H1N2 | Negative |
| EPI_ISL_25229  | A/swine/Shanghai/1/2007                   | H1N2 | Negative |
| EPI_ISL_253720 | A/swine/Iowa/A01671454/2016               | H1N2 | Negative |
| EPI_ISL_151990 | A/swine/Iowa/13C096/2013                  | H1N2 | Negative |
| EPI_ISL_195111 | A/swine/Denmark/10-1391-3/2011            | H1N2 | Negative |
| EPI_ISL_278872 | A/swine/Italy/165246/2014                 | H1N2 | Negative |
| EPI_ISL_150873 | A/swine/Oklahoma/01741/2007               | H1N2 | Negative |
| EPI_ISL_256249 | A/swine/Indiana/A01812028/2015            | H1N2 | Negative |
| EPI_ISL_235726 | A/swine/California/A01778665/2016         | H1N2 | Negative |
| EPI_ISL_195079 | A/swine/France/CotesdArmor-0558/2011      | H1N2 | Negative |
| EPI_ISL_271063 | A/swine/South_Dakota/MT_12_07_2081/2012   | H1N2 | Negative |
| EPI_ISL_150846 | A/swine/Texas/01308/2006                  | H1N2 | Negative |
| EPI_ISL_297208 | A/swine/Iowa/A02137183/2017               | H1N2 | Negative |
| EPI_ISL_207039 | A/swine/Manitoba/D0171/2012               | H1N2 | Negative |
| EPI_ISL_129558 | A/swine/Gent/100/2007                     | H1N2 | Negative |
| EPI_ISL_207921 | A/swine/Manitoba/D0341/2014               | H1N2 | Negative |
| EPI_ISL_96921  | A/swine/Indiana/00427/2004                | H1N2 | Negative |
| EPI_ISL_129498 | A/swine/England/661263/1997               | H1N2 | Negative |
| EPI_ISL_129505 | A/swine/England/88761/1997                | H1N2 | Negative |
| EPI_ISL_218299 | A/swine/Dong_Nai/09-16-1/2015             | H1N2 | Negative |
| EPI_ISL_195017 | A/swine/Italy/57680/2011                  | H1N2 | Negative |
| EPI_ISL_150921 | A/swine/North_Carolina/02249/2008         | H1N2 | Negative |
| EPI_ISL_262586 | A/swine/North_Carolina/A01667104/2017     | H1N2 | Negative |
| EPI_ISL_281310 | A/swine/North_Carolina/A02218906/2017     | H1N2 | Negative |
| EPI_ISL_151643 | A/swine/Iowa/SG1290/2007                  | H1N2 | Negative |
| EPI_ISL_200143 | A/swine/Indiana/A01260943/2015            | H1N2 | Negative |
| EPI_ISL_195157 | A/swine/France/22-120228/2012             | H1N2 | Negative |
| EPI_ISL_142690 | A/swine/Korea/CY12-03/2011                | H1N2 | Negative |
| EPI_ISL_129495 | A/swine/England/61605/1998                | H1N2 | Negative |
| EPI_ISL_95877  | A/swine/Italy/198260/2008                 | H1N2 | Negative |
| EPI_ISL_24576  | A/swine/Korea/JL04/2005                   | H1N2 | Negative |
| EPI_ISL_278853 | A/swine/Italy/333140/2014                 | H1N2 | Negative |
| EPI_ISL_195062 | A/swine/France/CotesdArmor-0198/2011      | H1N2 | Negative |
| EPI_ISL_234291 | A/swine/Indiana/A01812224/2016            | H1N2 | Negative |

|                |                                          |      |          |
|----------------|------------------------------------------|------|----------|
| EPI_ISL_127790 | A/swine/lowa/A01202677/2011              | H1N2 | Negative |
| EPI_ISL_153853 | A/swine/lowa/13H072/2013                 | H1N2 | Negative |
| EPI_ISL_195018 | A/swine/Italy/275736/2010                | H1N2 | Negative |
| EPI_ISL_218323 | A/swine/Dong_Nai/08-19-2/2015            | H1N2 | Negative |
| EPI_ISL_124037 | A/swine/Zhejiang/01/2008                 | H1N2 | Negative |
| EPI_ISL_150986 | A/swine/Minnesota/SG1370/2010            | H1N2 | Negative |
| EPI_ISL_195158 | A/swine/France/37-120345/2012            | H1N2 | Negative |
| EPI_ISL_218586 | A/swine/Dong_Nai/07-12-3/2015            | H1N2 | Negative |
| EPI_ISL_151197 | A/swine/North_Carolina/SG1335/2009       | H1N2 | Negative |
| EPI_ISL_132379 | A/swine/Nebraska/A01270646/2012          | H1N2 | Negative |
| EPI_ISL_278852 | A/swine/Italy/328356/2014                | H1N2 | Negative |
| EPI_ISL_243780 | A/swine/Indiana/15TOSU0829/2015          | H1N2 | Negative |
| EPI_ISL_261459 | A/swine/lowa/A01932419/2017              | H1N2 | Negative |
| EPI_ISL_147152 | A/swine/Virginia/A01432745/2013          | H1N2 | Negative |
| EPI_ISL_153861 | A/swine/Nebraska/A01104068/2013          | H1N2 | Negative |
| EPI_ISL_200935 | A/swine/Indiana/A01260933/2015           | H1N2 | Negative |
| EPI_ISL_195000 | A/swine/Germany/Lohne-IDT12877/2011      | H1N2 | Negative |
| EPI_ISL_218581 | A/swine/Dong_Nai/07-04-3/2015            | H1N2 | Negative |
| EPI_ISL_88369  | A/swine/Hong_Kong/729/2005               | H1N2 | Negative |
| EPI_ISL_12995  | A/swine/Doetlingen/IDT4735/2005          | H1N2 | Negative |
| EPI_ISL_129445 | A/swine/Korea/1204/2009                  | H1N2 | Negative |
| EPI_ISL_211807 | A/swine/Ohio/A01728547/2015              | H1N2 | Negative |
| EPI_ISL_145746 | A/swine/Missouri/A01432837/2013          | H1N2 | Negative |
| EPI_ISL_195083 | A/swine/Spain/79976/2007                 | H1N2 | Negative |
| EPI_ISL_88843  | A/swine/Minnesota/239106/2010            | H1N2 | Negative |
| EPI_ISL_195026 | A/swine/Netherlands/Haaksbergen-136/2011 | H1N2 | Negative |
| EPI_ISL_272837 | A/swine/South_Carolina/A02214849/2017    | H1N2 | Negative |
| EPI_ISL_24581  | A/swine/Korea/CY08/2007                  | H1N2 | Negative |
| EPI_ISL_234526 | A/swine/lowa/A01778108/2016              | H1N2 | Negative |
| EPI_ISL_95808  | A/swine/Minnesota/1192/2001              | H1N2 | Negative |
| EPI_ISL_143193 | A/swine/Ohio/11SW162/2011                | H1N2 | Negative |
| EPI_ISL_203194 | A/swine/Pennsylvania/A01944215/2015      | H1N2 | Negative |
| EPI_ISL_164464 | A/swine/DongNai/03-29-2/2011             | H1N2 | Negative |
| EPI_ISL_154633 | A/swine/Oklahoma/A01290898/2013          | H1N2 | Negative |
| EPI_ISL_129444 | A/swine/Korea/1130/2009                  | H1N2 | Negative |
| EPI_ISL_150840 | A/swine/North_Carolina/01169/2006        | H1N2 | Negative |
| EPI_ISL_88351  | A/swine/Hong_Kong/1304/2003              | H1N2 | Negative |
| EPI_ISL_296426 | A/swine/lowa/A02134236/2017              | H1N2 | Negative |
| EPI_ISL_208974 | A/swine/lowa/A01796529/2015              | H1N2 | Negative |
| EPI_ISL_119338 | A/swine/Minnesota/A01076210/2010         | H1N2 | Negative |
| EPI_ISL_164465 | A/swine/DongNai/03-30-2/2011             | H1N2 | Negative |
| EPI_ISL_235746 | A/swine/North_Carolina/A01732695/2016    | H1N2 | Negative |
| EPI_ISL_226061 | A/swine/Minnesota/A01943452/2016         | H1N2 | Negative |
| EPI_ISL_237046 | A/swine/North_Carolina/A01781221/2016    | H1N2 | Negative |
| EPI_ISL_150099 | A/swine/lowa/13B092/2013                 | H1N2 | Negative |
| EPI_ISL_218322 | A/swine/Dong_Nai/08-18-2/2015            | H1N2 | Negative |
| EPI_ISL_271735 | A/swine/lowa/MT_12_07_11_2_3/2011        | H1N2 | Negative |
| EPI_ISL_95867  | A/swine/Italy/62/1998                    | H1N2 | Negative |
| EPI_ISL_119339 | A/swine/Minnesota/A01076331/2010         | H1N2 | Negative |
| EPI_ISL_162678 | A/swine/Bac_Ninh/354/2013                | H1N2 | Negative |
| EPI_ISL_150998 | A/swine/North_Carolina/SG1389/2011       | H1N2 | Negative |
| EPI_ISL_140906 | A/swine/Kentucky/12TOSU1053/2012         | H1N2 | Negative |
| EPI_ISL_218598 | A/swine/Dong_Nai/07-29-3/2015            | H1N2 | Negative |
| EPI_ISL_205921 | A/swine/France/22-130212/2013            | H1N2 | Negative |
| EPI_ISL_103850 | A/swine/North_Carolina/A01048807/2011    | H1N2 | Negative |
| EPI_ISL_195179 | A/swine/Netherlands/Lemele-CVI2974A/2013 | H1N2 | Negative |
| EPI_ISL_245789 | A/swine/Indiana/15TOSU2743/2015          | H1N2 | Negative |
| EPI_ISL_95866  | A/swine/Italy/3592/1999                  | H1N2 | Negative |

|                |                                       |      |          |
|----------------|---------------------------------------|------|----------|
| EPI_ISL_127771 | A/swine/Nebraska/A01202501/2011       | H1N2 | Negative |
| EPI_ISL_95872  | A/swine/Italy/81226/2009              | H1N2 | Negative |
| EPI_ISL_218281 | A/swine/Dong_Nai/07-17-1/2015         | H1N2 | Negative |
| EPI_ISL_207160 | A/swine/Manitoba/D0297/2013           | H1N2 | Negative |
| EPI_ISL_195120 | A/swine/England/000304/2009           | H1N2 | Negative |
| EPI_ISL_195080 | A/swine/France/22-110529/2011         | H1N2 | Negative |
| EPI_ISL_96980  | A/swine/Hong_Kong/2237/2010           | H1N2 | Negative |
| EPI_ISL_258653 | A/swine/Minnesota/A01932042/2017      | H1N2 | Negative |
| EPI_ISL_278893 | A/swine/Italy/60011-3/2014            | H1N2 | Negative |
| EPI_ISL_254677 | A/swine/North_Carolina/A01672048/2017 | H1N2 | Negative |
| EPI_ISL_139268 | A/swine/Nebraska/A01445765/2013       | H1N2 | Negative |
| EPI_ISL_88353  | A/swine/Hong_Kong/1578/2003           | H1N2 | Negative |
| EPI_ISL_218583 | A/swine/Dong_Nai/07-07-3/2015         | H1N2 | Negative |
| EPI_ISL_163875 | A/swine/Nebraska/A01104081/2014       | H1N2 | Negative |
| EPI_ISL_198161 | A/swine/Indiana/A01260906/2015        | H1N2 | Negative |
| EPI_ISL_74372  | A/swine/Hong_Kong/1479/2009           | H1N2 | Negative |
| EPI_ISL_139266 | A/swine/Minnesota/A01445762/2013      | H1N2 | Negative |
| EPI_ISL_245321 | A/swine/Iowa/A01782577/2016           | H1N2 | Negative |
| EPI_ISL_285408 | A/swine/Iowa/A02221491/2017           | H1N2 | Negative |
| EPI_ISL_195037 | A/swine/Belgium/Oostkamp-26/2012      | H1N2 | Negative |
| EPI_ISL_91640  | A/swine/Hubei/05/2009                 | H1N2 | Negative |
| EPI_ISL_195446 | A/swine/South_Dakota/A01823237/2015   | H1N2 | Negative |
| EPI_ISL_278905 | A/swine/Italy/198930-3/2013           | H1N2 | Negative |
| EPI_ISL_161135 | A/swine/Indiana/13TOSU1160/2013       | H1N2 | Negative |
| EPI_ISL_97088  | A/swine/Oklahoma/A01049501/2011       | H1N2 | Negative |
| EPI_ISL_95805  | A/swine/Minnesota/5763/2003           | H1N2 | Negative |
| EPI_ISL_230188 | A/swine/Iowa/A01775725/2016           | H1N2 | Negative |
| EPI_ISL_168302 | A/swine/Texas/13TOSU0049/2013         | H1N2 | Negative |
| EPI_ISL_246096 | A/swine/Minnesota/A01668523/2016      | H1N1 | Negative |
| EPI_ISL_195144 | A/swine/Belgium/Glabbeek-287/2012     | H1N1 | Negative |
| EPI_ISL_151611 | A/swine/North_Carolina/SG1172/2003    | H1N1 | Negative |
| EPI_ISL_68984  | A/swine/Italy/671/1987                | H1N1 | Negative |
| EPI_ISL_196000 | A/swine/Mexico/8935602/2012           | H1N1 | Negative |
| EPI_ISL_280483 | A/swine/North_Carolina/A01785282/2017 | H1N1 | Negative |
| EPI_ISL_151609 | A/swine/Kentucky/SG1167/2003          | H1N1 | Negative |
| EPI_ISL_207053 | A/swine/Manitoba/D0175/2012           | H1N1 | Negative |
| EPI_ISL_88287  | A/swine/Hong_Kong/90/1979             | H1N1 | Negative |
| EPI_ISL_129483 | A/swine/England/39572/2001            | H1N1 | Negative |
| EPI_ISL_280477 | A/swine/Ohio/17TOSU1386/2017          | H1N1 | Negative |
| EPI_ISL_157893 | A/swine/Guangxi/G2/2013               | H1N1 | Negative |
| EPI_ISL_145707 | A/swine/Illinois/A00857317F/2012      | H1N1 | Negative |
| EPI_ISL_151260 | A/swine/Oklahoma/SG1457/2004          | H1N1 | Negative |
| EPI_ISL_222129 | A/swine/Germany/R1738/2010            | H1N1 | Negative |
| EPI_ISL_130023 | A/swine/Iowa/A01328941/2012           | H1N1 | Negative |
| EPI_ISL_200895 | A/swine/Indiana/14TOSU0454/2014       | H1N1 | Negative |
| EPI_ISL_167433 | A/swine/Ohio/A01476448/2014           | H1N1 | Negative |
| EPI_ISL_90106  | A/swine/Nebraska/A01049048/2010       | H1N1 | Negative |
| EPI_ISL_216994 | A/swine/North_Carolina/A01730376/2016 | H1N1 | Negative |
| EPI_ISL_151607 | A/swine/Texas/00195/2003              | H1N1 | Negative |
| EPI_ISL_129482 | A/swine/England/383/2005              | H1N1 | Negative |
| EPI_ISL_97093  | A/swine/Illinois/A01049574/2011       | H1N1 | Negative |
| EPI_ISL_205083 | A/swine/North_Carolina/A01795841/2015 | H1N1 | Negative |
| EPI_ISL_138994 | A/swine/Iowa/A0143271/2013            | H1N1 | Negative |
| EPI_ISL_151606 | A/swine/Texas/SG1162/2003             | H1N1 | Negative |
| EPI_ISL_156556 | A/swine/Illinois/A01427360/2013       | H1N1 | Negative |
| EPI_ISL_308752 | A/Swine/Belzig/02/2001                | H1N1 | Negative |
| EPI_ISL_88234  | A/swine/Hong_Kong/51/1977             | H1N1 | Negative |
| EPI_ISL_199473 | A/swine/Gent/74/95                    | H1N1 | Negative |

|                |                                           |      |          |
|----------------|-------------------------------------------|------|----------|
| EPI_ISL_140962 | A/swine/Nebraska/A01443544/2013           | H1N1 | Negative |
| EPI_ISL_285335 | A/swine/Iowa/A02221508/2017               | H1N1 | Negative |
| EPI_ISL_151207 | A/swine/Manitoba/01781/2007               | H1N1 | Negative |
| EPI_ISL_180682 | A/swine/Iowa/A01489009/2015               | H1N1 | Negative |
| EPI_ISL_96917  | A/swine/Illinois/02064/2008               | H1N1 | Negative |
| EPI_ISL_296675 | A/swine/North_Carolina/A02223226/2017     | H1N1 | Negative |
| EPI_ISL_150834 | A/swine/Minnesota/00938/2005              | H1N1 | Negative |
| EPI_ISL_206673 | A/swine/Indiana/A01260972/2015            | H1N1 | Negative |
| EPI_ISL_195068 | A/swine/France/Ille-et-Vilaine-0266/2011  | H1N1 | Negative |
| EPI_ISL_282074 | A/swine/Guangxi/BB2/2013                  | H1N1 | Negative |
| EPI_ISL_124007 | A/swine/Iowa/A01076187/2010               | H1N1 | Negative |
| EPI_ISL_153740 | A/swine/Oklahoma/A01290693/2013           | H1N1 | Negative |
| EPI_ISL_195056 | A/swine/Spain/22013/2011                  | H1N1 | Negative |
| EPI_ISL_129515 | A/swine/Ille-et-Vilaine/1455/1999         | H1N1 | Negative |
| EPI_ISL_151266 | A/swine/Minnesota/SG1470/2004             | H1N1 | Negative |
| EPI_ISL_150835 | A/swine/Arkansas/SG1241/2006              | H1N1 | Negative |
| EPI_ISL_235734 | A/swine/Iowa/A01778712/2016               | H1N1 | Negative |
| EPI_ISL_129454 | A/swine/England/010402/2003               | H1N1 | Negative |
| EPI_ISL_95804  | A/swine/Italy/1369-7/1994                 | H1N1 | Negative |
| EPI_ISL_282540 | A/swine/Manitoba/D0438/2016               | H1N1 | Negative |
| EPI_ISL_201851 | A/swine/Missouri/A01945149/2015           | H1N1 | Negative |
| EPI_ISL_237048 | A/swine/Iowa/A01781046/2016               | H1N1 | Negative |
| EPI_ISL_278926 | A/swine/Italy/122595/2012                 | H1N1 | Negative |
| EPI_ISL_195035 | A/swine/France/Loire-Atlantique-0405/2011 | H1N1 | Negative |
| EPI_ISL_262595 | A/swine/Iowa/A01667091/2017               | H1N1 | Negative |
| EPI_ISL_28425  | A/swine/Ratchaburi/NIH1481/2000           | H1N1 | Negative |
| EPI_ISL_127780 | A/swine/Mississippi/A01202593/2011        | H1N1 | Negative |
| EPI_ISL_278874 | A/swine/Italy/179794/2014                 | H1N1 | Negative |
| EPI_ISL_278846 | A/swine/Italy/10915/2015                  | H1N1 | Negative |
| EPI_ISL_208983 | A/swine/Missouri/A01796703/2015           | H1N1 | Negative |
| EPI_ISL_28428  | A/swine/Ratchaburi/NIH550/2003            | H1N1 | Negative |
| EPI_ISL_95807  | A/swine/North_Carolina/47834/2000         | H1N1 | Negative |
| EPI_ISL_256255 | A/swine/Indiana/A01812068/2015            | H1N1 | Negative |
| EPI_ISL_129455 | A/swine/England/101692/1997               | H1N1 | Negative |
| EPI_ISL_195052 | A/swine/Denmark/1085-1/2012               | H1N1 | Negative |
| EPI_ISL_218331 | A/swine/Shandong/S269/2014                | H1N1 | Negative |
| EPI_ISL_195023 | A/swine/Belgium/Gent-560/2010             | H1N1 | Negative |
| EPI_ISL_129492 | A/swine/England/57610/1999                | H1N1 | Negative |
| EPI_ISL_254875 | A/swine/Minnesota/A01672344/2017          | H1N1 | Negative |
| EPI_ISL_151610 | A/swine/North_Carolina/SG1170/2003        | H1N1 | Negative |
| EPI_ISL_88401  | A/swine/Hong_Kong/414/2009                | H1N1 | Negative |
| EPI_ISL_29412  | A/swine/France/WVL13/1995                 | H1N1 | Negative |
| EPI_ISL_216913 | A/swine/Minnesota/A01942199/2016          | H1N1 | Negative |
| EPI_ISL_8009   | A/swine/Iowa/2/1987                       | H1N1 | Negative |
| EPI_ISL_311324 | A/swine/Ohio/OH-18-7963/2018              | H1N1 | Negative |
| EPI_ISL_281247 | A/swine/Alberta/SD0154/2016               | H1N1 | Negative |
| EPI_ISL_211811 | A/swine/Illinois/A01728329/2015           | H1N1 | Negative |
| EPI_ISL_142642 | A/swine/Spain/SF11131/2007                | H1N1 | Negative |
| EPI_ISL_195160 | A/swine/France/01-130054/2013             | H1N1 | Negative |
| EPI_ISL_88361  | A/swine/Hong_Kong/NS856/2004              | H1N1 | Negative |
| EPI_ISL_278860 | A/swine/Italy/244784/2014                 | H1N1 | Negative |
| EPI_ISL_88359  | A/swine/Hong_Kong/NS318/2004              | H1N1 | Negative |
| EPI_ISL_129526 | A/swine/Italy/186678-2/2005               | H1N1 | Negative |
| EPI_ISL_282495 | A/swine/Quebec/SD0175/2016                | H1N1 | Negative |
| EPI_ISL_181106 | A/swine/North_Carolina/A01841602/2015     | H1N1 | Negative |
| EPI_ISL_173623 | A/swine/Missouri/A01567015/2014           | H1N1 | Negative |
| EPI_ISL_281242 | A/swine/Saskatchewan/SD0094/2015          | H1N1 | Negative |
| EPI_ISL_195162 | A/swine/Poland/1744/2012                  | H1N1 | Negative |

|                |                                        |      |          |
|----------------|----------------------------------------|------|----------|
| EPI_ISL_151200 | A/swine/Oklahoma/SG1349/2010           | H1N1 | Negative |
| EPI_ISL_151293 | A/swine/North_Carolina/01514/2007      | H1N1 | Negative |
| EPI_ISL_91942  | A/swine/Minnesota/00272/2004           | H1N1 | Negative |
| EPI_ISL_181107 | A/swine/North_Carolina/A01841556/2015  | H1N1 | Negative |
| EPI_ISL_199471 | A/swine/Gent/196/92                    | H1N1 | Negative |
| EPI_ISL_116999 | A/swine/Iowa/A01076215/2010            | H1N1 | Negative |
| EPI_ISL_93362  | A/swine/Iowa/A01049379/2011            | H1N1 | Negative |
| EPI_ISL_143442 | A/swine/Nebraska/A01380503/2013        | H1N1 | Negative |
| EPI_ISL_207114 | A/swine/Manitoba/D0270/2013            | H1N1 | Negative |
| EPI_ISL_74384  | A/swine/Hong_Kong/NS1065/2009          | H1N1 | Negative |
| EPI_ISL_129467 | A/swine/England/193667/1998            | H1N1 | Negative |
| EPI_ISL_263482 | A/swine/Indiana/16TOSU6511/2016        | H1N1 | Negative |
| EPI_ISL_129471 | A/swine/England/252411/1992            | H1N1 | Negative |
| EPI_ISL_29116  | A/swine/Greven/IDT2889/2004            | H1N1 | Negative |
| EPI_ISL_195124 | A/swine/England/1251/2011              | H1N1 | Negative |
| EPI_ISL_252710 | A/swine/Iowa/A01776531/2016            | H1N1 | Negative |
| EPI_ISL_207169 | A/swine/Alberta/SD0014/2013            | H1N1 | Negative |
| EPI_ISL_278897 | A/swine/Italy/311368/2013              | H1N1 | Negative |
| EPI_ISL_282075 | A/swine/Guangxi/GG6/2013               | H1N1 | Negative |
| EPI_ISL_96915  | A/swine/Minnesota/001200/2006          | H1N1 | Negative |
| EPI_ISL_195151 | A/swine/Belgium/111/2013               | H1N1 | Negative |
| EPI_ISL_194996 | A/swine/Germany/Lohne-IDT12137/2010    | H1N1 | Negative |
| EPI_ISL_150836 | A/swine/Oklahoma/SG1243/2006           | H1N1 | Negative |
| EPI_ISL_88379  | A/swine/Hong_Kong/72/2007              | H1N1 | Negative |
| EPI_ISL_129466 | A/swine/England/17788/2000             | H1N1 | Negative |
| EPI_ISL_129472 | A/swine/England/254/2002               | H1N1 | Negative |
| EPI_ISL_258623 | A/swine/Missouri/A01672819/2017        | H1N1 | Negative |
| EPI_ISL_150930 | A/swine/Oklahoma/SG1325/2009           | H1N1 | Negative |
| EPI_ISL_161195 | A/swine/Texas/13TOSU0050/2013          | H1N1 | Negative |
| EPI_ISL_97070  | A/swine/Iowa/A01049797/2011            | H1N1 | Negative |
| EPI_ISL_208942 | A/swine/Illinois/A01796450/2015        | H1N1 | Negative |
| EPI_ISL_278898 | A/swine/Italy/327666/2013              | H1N1 | Negative |
| EPI_ISL_95806  | A/swine/Minnesota/6998/2003            | H1N1 | Negative |
| EPI_ISL_150837 | A/swine/Oklahoma/SG1244/2006           | H1N1 | Negative |
| EPI_ISL_29424  | A/swine/Denmark/WVL9/1993              | H1N1 | Negative |
| EPI_ISL_129453 | A/swine/England/004772/2001            | H1N1 | Negative |
| EPI_ISL_195172 | A/swine/Poland/006801/2013             | H1N1 | Negative |
| EPI_ISL_195033 | A/swine/Netherlands/Putten-60/2012     | H1N1 | Negative |
| EPI_ISL_129469 | A/swine/England/200276/1992            | H1N1 | Negative |
| EPI_ISL_151616 | A/swine/Oklahoma/SG1188/2004           | H1N1 | Negative |
| EPI_ISL_261464 | A/swine/Iowa/A01932420/2017            | H1N1 | Negative |
| EPI_ISL_29408  | A/swine/Belgium/WVL1/1979              | H1N1 | Negative |
| EPI_ISL_246030 | A/swine/Arkansas/A01668226/2016        | H1N1 | Negative |
| EPI_ISL_195163 | A/swine/Poland/321/2012                | H1N1 | Negative |
| EPI_ISL_195130 | A/swine/Scotland/034632/2012           | H1N1 | Negative |
| EPI_ISL_256261 | A/swine/Indiana/A01812063/2015         | H1N1 | Negative |
| EPI_ISL_195173 | A/swine/Spain/33903/2012               | H1N1 | Negative |
| EPI_ISL_29414  | A/swine/England/WVL15/1997             | H1N1 | Negative |
| EPI_ISL_92314  | A/swine/Missouri/00564/2005            | H1N1 | Negative |
| EPI_ISL_151267 | A/swine/Oklahoma/00801/2005            | H1N1 | Negative |
| EPI_ISL_196019 | A/swine/Mexico/9783445/2013            | H1N1 | Negative |
| EPI_ISL_151274 | A/swine/North_Carolina/01550/2007      | H1N1 | Negative |
| EPI_ISL_195007 | A/swine/France/IlleetVilaine-0187/2011 | H1N1 | Negative |
| EPI_ISL_5288   | A/swine/Spain/53207/2004               | H1N1 | Negative |
| EPI_ISL_29409  | A/swine/England/WVL10/1993             | H1N1 | Negative |
| EPI_ISL_243375 | A/swine/North_Carolina/A01778828/2016  | H1N1 | Negative |
| EPI_ISL_195028 | A/swine/Belgium/Poperinge-387/2011     | H1N1 | Negative |
| EPI_ISL_246088 | A/swine/Iowa/A01668528/2016            | H1N1 | Negative |

|                |                                             |      |          |
|----------------|---------------------------------------------|------|----------|
| EPI_ISL_96929  | A/swine/Illinois/SG1141/2003                | H1N1 | Negative |
| EPI_ISL_96926  | A/swine/Minnesota/01358/2006                | H1N1 | Negative |
| EPI_ISL_151264 | A/swine/Iowa/00250/2004                     | H1N1 | Negative |
| EPI_ISL_285478 | A/swine/Minnesota/A02221496/2017            | H1N1 | Negative |
| EPI_ISL_151202 | A/swine/Texas/SG1380/2011                   | H1N1 | Negative |
| EPI_ISL_129465 | A/swine/England/17787/2000                  | H1N1 | Negative |
| EPI_ISL_151989 | A/swine/Iowa/13E088/2013                    | H1N1 | Negative |
| EPI_ISL_199469 | A/swine/Belgium/1/79                        | H1N1 | Negative |
| EPI_ISL_197216 | A/swine/Iowa/A02025218/2015                 | H1N1 | Negative |
| EPI_ISL_195041 | A/swine/Belgium/Neerpelt-37/2011            | H1N1 | Negative |
| EPI_ISL_151215 | A/swine/North_Carolina/SG1281/2007          | H1N1 | Negative |
| EPI_ISL_96925  | A/swine//Ohio/02026/2008                    | H1N1 | Negative |
| EPI_ISL_88273  | A/swine/Hong_Kong/66/1977                   | H1N1 | Negative |
| EPI_ISL_207980 | A/swine/Saskatchewan/SD0056/2014            | H1N1 | Negative |
| EPI_ISL_281967 | A/swine/Minnesota/MT_13_01_S49/2013         | H1N1 | Negative |
| EPI_ISL_199476 | A/swine/England/195852/92                   | H1N1 | Negative |
| EPI_ISL_195153 | A/swine/France/22-120146/2012               | H1N1 | Negative |
| EPI_ISL_195086 | A/swine/Germany/Ahlen-Dolberg-IDT14631/2012 | H1N1 | Negative |
| EPI_ISL_88399  | A/swine/Hong_Kong/NS184/2009                | H1N1 | Negative |
| EPI_ISL_222094 | A/swine/Iowa/A01732729/2016                 | H1N1 | Negative |
| EPI_ISL_129464 | A/swine/England/167655/1997                 | H1N1 | Negative |
| EPI_ISL_88264  | A/swine/Hong_Kong/55/1977                   | H1N1 | Negative |
| EPI_ISL_150830 | A/swine/Oklahoma/SG1217/2005                | H1N1 | Negative |
| EPI_ISL_278862 | A/swine/Italy/263752/2014                   | H1N1 | Negative |
| EPI_ISL_260813 | A/swine/North_Carolina/A01672751/2017       | H1N1 | Negative |
| EPI_ISL_150870 | A/swine/Texas/SG1271/2007                   | H1N1 | Negative |
| EPI_ISL_195266 | A/swine/Poland/18275/2012                   | H1N1 | Negative |
| EPI_ISL_167340 | A/swine/Oklahoma/A01476227/2014             | H1N1 | Negative |
| EPI_ISL_124335 | A/swine/Illinois/A01076767/2010             | H1N1 | Negative |
| EPI_ISL_134283 | A/swine/Illinois/A01244401/2012             | H1N1 | Negative |
| EPI_ISL_195011 | A/swine/France/Finistere-0011/2011          | H1N1 | Negative |
| EPI_ISL_127701 | A/swine/Minnesota/A01203313/2012            | H1N1 | Negative |
| EPI_ISL_195032 | A/swine/Netherlands/Meijel-75/2011          | H1N1 | Negative |
| EPI_ISL_151291 | A/swine/North_Carolina/01591/2007           | H1N1 | Negative |
| EPI_ISL_129573 | A/swine/Gent/132/2005                       | H1N1 | Negative |
| EPI_ISL_195154 | A/swine/France/50-120350/2012               | H1N1 | Negative |
| EPI_ISL_285329 | A/swine/Iowa/A02221659/2017                 | H1N1 | Negative |
| EPI_ISL_151621 | A/swine/Arkansas/SG1214/2005                | H1N1 | Negative |
| EPI_ISL_12792  | A/swine/Tianjin/01/04                       | H1N1 | Negative |
| EPI_ISL_138215 | A/swine/Minnesota/A01445265/2013            | H1N1 | Negative |
| EPI_ISL_150996 | A/swine/North_Carolina/SG1387/2011          | H1N1 | Negative |
| EPI_ISL_304092 | A/swine/Czech_Republic/25-18/2017           | H1N1 | Negative |
| EPI_ISL_281751 | A/swine/Ohio/A01354304/2017                 | H1N1 | Negative |
| EPI_ISL_88239  | A/swine/Hong_Kong/28/1977                   | H1N1 | Negative |
| EPI_ISL_150887 | A/swine/Texas/01522/2007                    | H1N1 | Negative |
| EPI_ISL_129451 | A/swine/England/001195/2007                 | H1N1 | Negative |
| EPI_ISL_195054 | A/swine/Denmark/10146-1/2012                | H1N1 | Negative |
| EPI_ISL_140918 | A/swine/Ohio/12TOSU45/2012                  | H1N1 | Negative |
| EPI_ISL_151614 | A/swine/Missouri/SG1182/2003                | H1N1 | Negative |
| EPI_ISL_278834 | A/swine/Italy/203977/2015                   | H1N1 | Negative |
| EPI_ISL_29416  | A/swine/Scotland/WVL17/1999                 | H1N1 | Negative |
| EPI_ISL_169560 | A/swine/Guangdong/6/2013                    | H1N1 | Negative |
| EPI_ISL_129496 | A/swine/England/636804/1996                 | H1N1 | Negative |
| EPI_ISL_145714 | A/swine/Italy/73449/2013                    | H1N1 | Negative |
| EPI_ISL_205071 | A/swine/North_Carolina/A01795758/2015       | H1N1 | Negative |
| EPI_ISL_282706 | A/swine/Saskatchewan/SD0108/2015            | H1N1 | Negative |
| EPI_ISL_151916 | A/swine/Minnesota/A01394863/2013            | H1N1 | Negative |
| EPI_ISL_129510 | A/wild_boar/Germany-HE/ws336/2009           | H1N1 | Negative |

|                |                                          |      |          |
|----------------|------------------------------------------|------|----------|
| EPI_ISL_252802 | A/swine/North_Carolina/A01668901/2016    | H1N1 | Negative |
| EPI_ISL_129525 | A/swine/Italy/172336/2001                | H1N1 | Negative |
| EPI_ISL_150845 | A/swine/Minnesota/00991/2006             | H1N1 | Negative |
| EPI_ISL_129807 | A/swine/Iowa/A01203809/2012              | H1N1 | Negative |
| EPI_ISL_281985 | A/swine/Ohio/A02219547/2017              | H1N1 | Negative |
| EPI_ISL_253925 | A/swine/Oklahoma/A01671948/2016          | H1N1 | Negative |
| EPI_ISL_278801 | A/swine/Quebec/1587352/2014              | H1N1 | Negative |
| EPI_ISL_195031 | A/swine/Belgium/Faimes-628/2010          | H1N1 | Negative |
| EPI_ISL_132827 | A/swine/Korea/VDS3/2009                  | H1N1 | Negative |
| EPI_ISL_257154 | A/swine/Oklahoma/A01672680/2017          | H1N1 | Negative |
| EPI_ISL_151265 | A/swine/Minnesota/00352/2004             | H1N1 | Negative |
| EPI_ISL_271667 | A/swine/Minnesota/MT_12_07_11_3_12/2011  | H1N1 | Negative |
| EPI_ISL_96924  | A/swine/North_Carolina/00839/2005        | H1N1 | Negative |
| EPI_ISL_127901 | A/swine/Illinois/A00857136c/2011         | H1N1 | Negative |
| EPI_ISL_195005 | A/swine/Germany/Ostbevern-IDT13211/2011  | H1N1 | Negative |
| EPI_ISL_208916 | A/swine/North_Carolina/A01797415/2015    | H1N1 | Negative |
| EPI_ISL_88365  | A/swine/Hong_Kong/275/2005               | H1N1 | Negative |
| EPI_ISL_173677 | A/swine/Arkansas/A01840184/2014          | H1N1 | Negative |
| EPI_ISL_129970 | A/swine/Minnesota/A01301732/2012         | H1N1 | Negative |
| EPI_ISL_79273  | A/swine/Germany-NI/R248/09               | H1N1 | Negative |
| EPI_ISL_150922 | A/swine/North_Carolina/SG1310/2008       | H1N1 | Negative |
| EPI_ISL_90125  | A/swine/Minnesota/A01049101/2010         | H1N1 | Negative |
| EPI_ISL_138858 | A/swine/Iowa/A01445629/2013              | H1N1 | Negative |
| EPI_ISL_128170 | A/swine/Mexico/Ver37/2010                | H1N1 | Negative |
| EPI_ISL_153768 | A/swine/North_Carolina/A01290771/2013    | H1N1 | Negative |
| EPI_ISL_93366  | A/swine/Minnesota/A01049462/2011         | H1N1 | Negative |
| EPI_ISL_195380 | A/swine/Pennsylvania/A02024933/2015      | H1N1 | Negative |
| EPI_ISL_161167 | A/swine/Indiana/13TOSU1988/2013          | H1N1 | Negative |
| EPI_ISL_74378  | A/swine/Hong_Kong/2433/2009              | H1N1 | Negative |
| EPI_ISL_117003 | A/swine/Minnesota/A01134527/2011         | H1N1 | Negative |
| EPI_ISL_199475 | A/swine/Belgium/1/83                     | H1N1 | Negative |
| EPI_ISL_200140 | A/swine/California/A01459047/2015        | H1N1 | Negative |
| EPI_ISL_196006 | A/swine/Mexico/9557133/2013              | H1N1 | Negative |
| EPI_ISL_129511 | A/swine/Finnistere/800/2004              | H1N1 | Negative |
| EPI_ISL_169576 | A/swine/Hunan/951/2013                   | H1N1 | Negative |
| EPI_ISL_97115  | A/swine/Minnesota/A01049893/2011         | H1N1 | Negative |
| EPI_ISL_63616  | A/swine/Minnesota/07002083/2007          | H1N1 | Negative |
| EPI_ISL_88258  | A/swine/Hong_Kong/48/1977                | H1N1 | Negative |
| EPI_ISL_151778 | A/swine/Illinois/A01227426/2013          | H1N1 | Negative |
| EPI_ISL_150923 | A/swine/North_Carolina/02403/2008        | H1N1 | Negative |
| EPI_ISL_281958 | A/swine/Minnesota/MT_13_01_S43/2013      | H1N1 | Negative |
| EPI_ISL_129528 | A/swine/Italy/289171/2003                | H1N1 | Negative |
| EPI_ISL_151213 | A/swine/Nebraska/00178/2003              | H1N1 | Negative |
| EPI_ISL_195155 | A/swine/France/22-120340/2012            | H1N1 | Negative |
| EPI_ISL_243807 | A/swine/Indiana/A01812247/2016           | H1N1 | Negative |
| EPI_ISL_272824 | A/swine/Minnesota/A02214666/2017         | H1N1 | Negative |
| EPI_ISL_225564 | A/swine/Minnesota/A01774384/2016         | H1N1 | Negative |
| EPI_ISL_195015 | A/swine/Italy/302593/2010                | H1N1 | Negative |
| EPI_ISL_170579 | A/swine/Germany/2/1981                   | H1N1 | Negative |
| EPI_ISL_260803 | A/swine/Iowa/A01672342/2017              | H1N1 | Negative |
| EPI_ISL_282135 | A/swine/Czech_Republic/13240/2017_(H1N1) | H1N1 | Negative |
| EPI_ISL_95802  | A/swine/North_Carolina/18161/2002        | H1N1 | Negative |
| EPI_ISL_127793 | A/swine/Michigan/A01202708/2011          | H1N1 | Negative |
| EPI_ISL_243783 | A/swine/North_Carolina/A01781336/2016    | H1N1 | Negative |
| EPI_ISL_195142 | A/swine/Belgium/Minderhout-348/2012      | H1N1 | Negative |
| EPI_ISL_195156 | A/swine/France/29-120326/2012            | H1N1 | Negative |
| EPI_ISL_29419  | A/swine/France/WVL4/1985                 | H1N1 | Negative |
| EPI_ISL_195058 | A/swine/Spain/23998/2011                 | H1N1 | Negative |

|                |                                             |      |          |
|----------------|---------------------------------------------|------|----------|
| EPI_ISL_278868 | A/swine/Italy/133457-3/2014                 | H1N1 | Negative |
| EPI_ISL_151289 | A/swine/South_Carolina/01414/2006           | H1N1 | Negative |
| EPI_ISL_151284 | A/swine/Texas/00867/2005                    | H1N1 | Negative |
| EPI_ISL_29420  | A/swine/Belgium/WVL5/1989                   | H1N1 | Negative |
| EPI_ISL_151208 | A/swine/Saskatchewan/01974/2008             | H1N1 | Negative |
| EPI_ISL_264208 | A/swine/Ohio/A02214229/2017                 | H1N1 | Negative |
| EPI_ISL_253727 | A/swine/Indiana/A01671620/2016              | H1N1 | Negative |
| EPI_ISL_221727 | A/swine/North_Carolina/A01733980/2016       | H1N1 | Negative |
| EPI_ISL_188901 | A/swine/Ohio/A01847657/2015                 | H1N1 | Negative |
| EPI_ISL_151285 | A/swine/Oklahoma/00790/2005                 | H1N1 | Negative |
| EPI_ISL_150872 | A/swine/Texas/01657/2007                    | H1N1 | Negative |
| EPI_ISL_132360 | A/swine/Iowa/A01203904/2012                 | H1N1 | Negative |
| EPI_ISL_166533 | A/swine/Guangdong/SS1/2012                  | H1N1 | Negative |
| EPI_ISL_195040 | A/swine/Netherlands/Dalfsen-12/2012         | H1N1 | Negative |
| EPI_ISL_130041 | A/swine/Nebraska/A01327160/2012             | H1N1 | Negative |
| EPI_ISL_88348  | A/swine/Hong_Kong/841/2003                  | H1N1 | Negative |
| EPI_ISL_150847 | A/swine/Virginia/01359/2006                 | H1N1 | Negative |
| EPI_ISL_151270 | A/swine/Oklahoma/01139/2006                 | H1N1 | Negative |
| EPI_ISL_203151 | A/swine/Indiana/A01812000/2015              | H1N1 | Negative |
| EPI_ISL_195085 | A/swine/Germany/Reinberg-IDT14457-1/2012    | H1N1 | Negative |
| EPI_ISL_225549 | A/swine/North_Carolina/A01774921/2016       | H1N1 | Negative |
| EPI_ISL_71595  | A/swine/Germany-BB/siv-leipz11308/09        | H1N1 | Negative |
| EPI_ISL_129559 | A/swine/Gent/112/2007                       | H1N1 | Negative |
| EPI_ISL_195024 | A/swine/Netherlands/Kootwijkerbroek-51/2012 | H1N1 | Negative |
| EPI_ISL_195106 | A/swine/Italy/28762-3/2013                  | H1N1 | Negative |
| EPI_ISL_96922  | A/swine/Minnesota/02905/2009                | H1N1 | Negative |
| EPI_ISL_130124 | A/swine/Nebraska/A01301493/2012             | H1N1 | Negative |
| EPI_ISL_130006 | A/swine/Minnesota/A01241397/2012            | H1N1 | Negative |
| EPI_ISL_256370 | A/swine/Jiangsu/POS759/2013                 | H1N1 | Negative |
| EPI_ISL_258617 | A/swine/Iowa/A01672824/2017                 | H1N1 | Negative |
| EPI_ISL_195112 | A/swine/Poland/16315/2011                   | H1N1 | Negative |
| EPI_ISL_106287 | A/swine/North_Carolina/3793/2008            | H1N1 | Negative |
| EPI_ISL_132318 | A/swine/Indiana/A01260029/2012              | H1N1 | Negative |
| EPI_ISL_71594  | A/swine/Germany-SH/R1737/09                 | H1N1 | Negative |
| EPI_ISL_299404 | A/swine/Kansas/A01378038/2017               | H1N1 | Negative |
| EPI_ISL_151211 | A/swine/North_Carolina/SG1307/2008          | H1N1 | Negative |
| EPI_ISL_237038 | A/swine/Iowa/A01781047/2016                 | H1N1 | Negative |
| EPI_ISL_195025 | A/swine/Netherlands/Groenlo-37/2012         | H1N1 | Negative |
| EPI_ISL_96940  | A/swine/Illinois/02385/2008                 | H1N1 | Negative |
| EPI_ISL_88255  | A/swine/Hong_Kong/45/1977                   | H1N1 | Negative |
| EPI_ISL_207041 | A/swine/Manitoba/D0172/2012                 | H1N1 | Negative |
| EPI_ISL_29308  | A/swine/Hungary/19774/2006                  | H1N1 | Negative |
| EPI_ISL_129460 | A/swine/England/117316/1986                 | H1N1 | Negative |
| EPI_ISL_297123 | A/swine/Nebraska/A02136881/2017             | H1N1 | Negative |
| EPI_ISL_129579 | A/swine/Italy/29313/2006                    | H1N1 | Negative |
| EPI_ISL_154632 | A/swine/North_Carolina/A01290892/2013       | H1N1 | Negative |
| EPI_ISL_117012 | A/swine/Oklahoma/A01134906/2011             | H1N1 | Negative |
| EPI_ISL_98867  | A/swine/Mississippi/A01202059/2011          | H1N1 | Negative |
| EPI_ISL_129487 | A/swine/England/425742/1994                 | H1N1 | Negative |
| EPI_ISL_155700 | A/swine/South_Dakota/SJ1319788/2013         | H1N1 | Negative |
| EPI_ISL_195181 | A/swine/Netherlands/Mill-CVI2617A/2012      | H1N1 | Negative |
| EPI_ISL_150673 | A/swine/Oklahoma/A01290605/2013             | H1N1 | Negative |
| EPI_ISL_278866 | A/swine/Italy/302661/2014                   | H1N1 | Negative |
| EPI_ISL_151196 | A/swine/Illinois/02166/2008                 | H1N1 | Negative |
| EPI_ISL_132964 | A/swine/Nebraska/A01277241/2012             | H1N1 | Negative |
| EPI_ISL_29421  | A/swine/Spain/WVL6/1991                     | H1N1 | Negative |
| EPI_ISL_143152 | A/swine/Illinois/A01158960/2013             | H1N1 | Negative |
| EPI_ISL_151254 | A/swine/Texas/00244/2004                    | H1N1 | Negative |

|                |                                            |      |          |
|----------------|--------------------------------------------|------|----------|
| EPI_ISL_150940 | A/swine/Illinois/02757/2009                | H1N1 | Negative |
| EPI_ISL_138219 | A/swine/Indiana/A01260209/2013             | H1N1 | Negative |
| EPI_ISL_137557 | A/swine/North_Carolina/A01444883/2013      | H1N1 | Negative |
| EPI_ISL_143149 | A/swine/Illinois/A01203923/2012            | H1N1 | Negative |
| EPI_ISL_278867 | A/swine/Italy/304621/2014                  | H1N1 | Negative |
| EPI_ISL_243772 | A/swine/Indiana/15TOSU0860/2015            | H1N1 | Negative |
| EPI_ISL_124332 | A/swine/Minnesota/A01076180/2009           | H1N1 | Negative |
| EPI_ISL_29422  | A/swine/England/WVL7/1992                  | H1N1 | Negative |
| EPI_ISL_222096 | A/swine/Oklahoma/A01732565/2016            | H1N1 | Negative |
| EPI_ISL_168335 | A/swine/Indiana/13TOSU4293/2013            | H1N1 | Negative |
| EPI_ISL_196021 | A/swine/Mexico/9800323/2013                | H1N1 | Negative |
| EPI_ISL_195105 | A/swine/France/56-110525/2010              | H1N1 | Negative |
| EPI_ISL_97090  | A/swine/Missouri/A01049487/2011            | H1N1 | Negative |
| EPI_ISL_266543 | A/swine/Illinois/A02214663/2017            | H1N1 | Negative |
| EPI_ISL_116993 | A/swine/Illinois/A01134216/2011            | H1N1 | Negative |
| EPI_ISL_264228 | A/swine/Iowa/A01667089/2017                | H1N1 | Negative |
| EPI_ISL_129521 | A/swine/Italy/1513-1/1998                  | H1N1 | Negative |
| EPI_ISL_129499 | A/swine/England/68327/1998                 | H1N1 | Negative |
| EPI_ISL_138860 | A/swine/Illinois/A01445653/2013            | H1N1 | Negative |
| EPI_ISL_253702 | A/swine/Illinois/A01671425/2016            | H1N1 | Negative |
| EPI_ISL_88249  | A/swine/Hong_Kong/39/1977                  | H1N1 | Negative |
| EPI_ISL_129458 | A/swine/England/1131/2004                  | H1N1 | Negative |
| EPI_ISL_98868  | A/swine/Iowa/A01202056/2011                | H1N1 | Negative |
| EPI_ISL_79277  | A/swine/Germany-NI/R3394/09                | H1N1 | Negative |
| EPI_ISL_237036 | A/swine/Iowa/A01781050/2016                | H1N1 | Negative |
| EPI_ISL_88347  | A/swine/Hong_Kong/638/2003                 | H1N1 | Negative |
| EPI_ISL_252718 | A/swine/North_Carolina/A01776362/2016      | H1N1 | Negative |
| EPI_ISL_129518 | A/swine/OMS/2112/1995                      | H1N1 | Negative |
| EPI_ISL_127784 | A/swine/Indiana/A01202622/2011             | H1N1 | Negative |
| EPI_ISL_278870 | A/swine/Italy/138746/2014                  | H1N1 | Negative |
| EPI_ISL_92022  | A/swine/Minnesota/01076/2006               | H1N1 | Negative |
| EPI_ISL_129479 | A/swine/England/35320/1999                 | H1N1 | Negative |
| EPI_ISL_88253  | A/swine/Hong_Kong/43/1977                  | H1N1 | Negative |
| EPI_ISL_258625 | A/swine/Indiana/A01672825/2017             | H1N1 | Negative |
| EPI_ISL_278829 | A/swine/Italy/154890-2/2015                | H1N1 | Negative |
| EPI_ISL_203136 | A/swine/Indiana/A01945792/2015             | H1N1 | Negative |
| EPI_ISL_297126 | A/swine/Oklahoma/A02135952/2017            | H1N1 | Negative |
| EPI_ISL_282403 | A/swine/Illinois/A02219783/2017            | H1N1 | Negative |
| EPI_ISL_181274 | A/swine/North_Carolina/A01476862/2014      | H1N1 | Negative |
| EPI_ISL_150705 | A/swine/Tennessee/00264/2004               | H1N1 | Negative |
| EPI_ISL_13578  | A/swine/Haseluenne/IDT2617/03              | H1N1 | Negative |
| EPI_ISL_151002 | A/swine/Iowa/SG1401/2011                   | H1N1 | Negative |
| EPI_ISL_195146 | A/swine/Belgium/Heist-op-den-Berg-363/2012 | H1N1 | Negative |
| EPI_ISL_116143 | A/swine/Illinois/A01203226/2012            | H1N1 | Negative |
| EPI_ISL_29423  | A/swine/France/WVL8/1992                   | H1N1 | Negative |
| EPI_ISL_161111 | A/swine/Indiana/13TOSU1043/2013            | H1N1 | Negative |
| EPI_ISL_87552  | A/swine/Iowa/A01057153/2010                | H1N1 | Negative |
| EPI_ISL_203117 | A/swine/North_Carolina/A01795443/2015      | H1N1 | Negative |
| EPI_ISL_151615 | A/swine/Colorado/SG1185/2004               | H1N1 | Negative |
| EPI_ISL_5287   | A/swine/Spain/51915/2003                   | H1N1 | Negative |
| EPI_ISL_253918 | A/swine/Nebraska/A01671947/2016            | H1N1 | Negative |
| EPI_ISL_156554 | A/swine/Illinois/A01427261/2013            | H1N1 | Negative |
| EPI_ISL_161154 | A/swine/Indiana/13TOSU0832/2013            | H1N1 | Negative |
| EPI_ISL_295526 | A/swine/Kansas/A01378037/2017              | H1N1 | Negative |
| EPI_ISL_151259 | A/swine/North_Carolina/00371/2004          | H1N1 | Negative |
| EPI_ISL_128168 | A/swine/Mexico/Ver29/2010                  | H1N1 | Negative |
| EPI_ISL_278888 | A/swine/Italy/359202/2013                  | H1N1 | Negative |
| EPI_ISL_278908 | A/swine/Italy/280201/2013                  | H1N1 | Negative |

|                |                                         |      |          |
|----------------|-----------------------------------------|------|----------|
| EPI_ISL_296710 | A/swine/Wisconsin/A01104100/2017        | H1N1 | Negative |
| EPI_ISL_88248  | A/swine/Hong_Kong/38/1977               | H1N1 | Negative |
| EPI_ISL_246023 | A/swine/Missouri/A01668216/2016         | H1N1 | Negative |
| EPI_ISL_296673 | A/swine/Minnesota/A02223472/2017        | H1N1 | Negative |
| EPI_ISL_129522 | A/swine/Italy/151672-3/2003             | H1N1 | Negative |
| EPI_ISL_116936 | A/swine/Illinois/A01047984/2011         | H1N1 | Negative |
| EPI_ISL_88276  | A/swine/Hong_Kong/70/1977               | H1N1 | Negative |
| EPI_ISL_260815 | A/swine/Kansas/A01378019/2017           | H1N1 | Negative |
| EPI_ISL_93354  | A/swine/Iowa/A01049244/2010             | H1N1 | Negative |
| EPI_ISL_199470 | A/swine/Belgium/1/98                    | H1N1 | Negative |
| EPI_ISL_129447 | A/swine/Bieganow/1/2001                 | H1N1 | Negative |
| EPI_ISL_195029 | A/swine/Belgium/Meeuwen-231/2011        | H1N1 | Negative |
| EPI_ISL_195038 | A/swine/Belgium/Wingene-455/2011        | H1N1 | Negative |
| EPI_ISL_13917  | A/swine/Chachoengsao/NIAH587/2005       | H1N1 | Negative |
| EPI_ISL_7790   | A/swine/Tennessee/23/1976               | H1N1 | Negative |
| EPI_ISL_5203   | A/Swine/Spain/50047/2003                | H1N1 | Negative |
| EPI_ISL_97126  | A/swine/Iowa/A01049949/2011             | H1N1 | Negative |
| EPI_ISL_4038   | A/swine/Saskatchewan/18789/02           | H1N1 | Negative |
| EPI_ISL_100196 | A/swine/Ohio/FAH2-1/2008                | H1N1 | Negative |
| EPI_ISL_9880   | A/swine/Ontario/53518/03                | H1N1 | Negative |
| EPI_ISL_133715 | A/swine/Minnesota/A01244318/2012        | H1N1 | Negative |
| EPI_ISL_150924 | A/swine/North_Carolina/SG1313/2008      | H1N1 | Negative |
| EPI_ISL_124407 | A/swine/Illinois/A01047982/2011         | H1N1 | Negative |
| EPI_ISL_195021 | A/swine/Netherlands/GroelInlo-186/2011  | H1N1 | Negative |
| EPI_ISL_151282 | A/swine/Minnesota/00401/2004            | H1N1 | Negative |
| EPI_ISL_278876 | A/swine/Italy/96500/2014                | H1N1 | Negative |
| EPI_ISL_129457 | A/swine/England/1093/2005               | H1N1 | Negative |
| EPI_ISL_129501 | A/swine/England/745769/1995             | H1N1 | Negative |
| EPI_ISL_151263 | A/swine/North_Carolina/SG1463/2004      | H1N1 | Negative |
| EPI_ISL_129502 | A/swine/England/771270/1995             | H1N1 | Negative |
| EPI_ISL_243759 | A/swine/Indiana/15TOSU1184/2015         | H1N1 | Negative |
| EPI_ISL_195145 | A/swine/Netherlands/Hoogeloon-167C/2012 | H1N1 | Negative |
| EPI_ISL_176705 | A/Utah/10/2015                          | H3N2 | Positive |
| EPI_ISL_235233 | A/Moscow/1514A00504942N/2012            | H3N2 | Positive |
| EPI_ISL_302484 | A/Cardiff/7495/2017                     | H3N2 | Positive |
| EPI_ISL_263254 | A/Bage/LACENRS-2050/2013                | H3N2 | Positive |
| EPI_ISL_329971 | A/Iowa/38/2017                          | H3N2 | Positive |
| EPI_ISL_108091 | A/Boston/DOA17/2011                     | H3N2 | Positive |
| EPI_ISL_114014 | A/Bilthoven/5029/1976                   | H3N2 | Positive |
| EPI_ISL_114019 | A/Rotterdam/5828/1977                   | H3N2 | Positive |
| EPI_ISL_5525   | A/New_York/707/1994                     | H3N2 | Positive |
| EPI_ISL_129188 | A/Michigan/20/2012                      | H3N2 | Positive |
| EPI_ISL_129176 | A/Maryland/25/2012                      | H3N2 | Positive |
| EPI_ISL_322180 | A/Caerphilly/1813/2018                  | H3N2 | Positive |
| EPI_ISL_118112 | A/Hanoi/N062/2007                       | H3N2 | Positive |
| EPI_ISL_5486   | A/New_York/657/1994                     | H3N2 | Positive |
| EPI_ISL_6747   | A/New_York/248/1999                     | H3N2 | Positive |
| EPI_ISL_312866 | A/Minnesota/38/2018                     | H3N2 | Positive |
| EPI_ISL_129621 | A/Michigan/23/2012                      | H3N2 | Positive |
| EPI_ISL_120372 | A/Malaysia/26682/2004                   | H3N2 | Positive |
| EPI_ISL_127606 | A/reassortant/X-145                     | H3N2 | Positive |
| EPI_ISL_5555   | A/New_York/779/1993                     | H3N2 | Positive |
| EPI_ISL_5381   | A/New_York/702/1995                     | H3N2 | Positive |
| EPI_ISL_5297   | A/New_York/611/1995                     | H3N2 | Positive |
| EPI_ISL_99793  | A/Iowa/09/2011                          | H3N2 | Positive |
| EPI_ISL_344895 | A/Bretagne/1296/2019                    | H3N2 | Positive |
| EPI_ISL_62513  | A/New_York/3280/2009                    | H3N2 | Positive |
| EPI_ISL_114200 | A/Bilthoven/10684/1982                  | H3N2 | Positive |

|                |                                    |      |          |
|----------------|------------------------------------|------|----------|
| EPI_ISL_76123  | A/California/VRDL144/2009          | H3N2 | Positive |
| EPI_ISL_5307   | A/New_York/637/1996                | H3N2 | Positive |
| EPI_ISL_294265 | A/Maryland/50/2017                 | H3N2 | Positive |
| EPI_ISL_6481   | A/Queensland/47/2004               | H3N2 | Positive |
| EPI_ISL_294273 | A/Maryland/60/2017                 | H3N2 | Positive |
| EPI_ISL_246097 | A/Hong_Kong/01/1968                | H3N2 | Positive |
| EPI_ISL_66559  | A/Victoria/208/2009                | H3N2 | Positive |
| EPI_ISL_9030   | A/Memphis/2/78                     | H3N2 | Positive |
| EPI_ISL_8676   | A/Hong_Kong/6/1972                 | H3N2 | Positive |
| EPI_ISL_124928 | A/Leningrad/360/1986               | H3N2 | Positive |
| EPI_ISL_8191   | A/New_York/382/2005                | H3N2 | Positive |
| EPI_ISL_8638   | A/New_York/431/2000                | H3N2 | Positive |
| EPI_ISL_8696   | A/Hong_Kong/14/1992                | H3N2 | Positive |
| EPI_ISL_115460 | A/Finland/339/1995                 | H3N2 | Positive |
| EPI_ISL_7153   | A/Auckland/616/2005                | H3N2 | Positive |
| EPI_ISL_5380   | A/New_York/698/1995                | H3N2 | Positive |
| EPI_ISL_9104   | A/Whanganui/129/2004               | H3N2 | Positive |
| EPI_ISL_327396 | A/Cowbridge/8371/2018              | H3N2 | Positive |
| EPI_ISL_114610 | A/Beijing/32/1992                  | H3N2 | Positive |
| EPI_ISL_9252   | A/Memphis/3/1980                   | H3N2 | Positive |
| EPI_ISL_6862   | A/South_Australia/80/2000          | H3N2 | Positive |
| EPI_ISL_5663   | A/New_York/772/1993                | H3N2 | Positive |
| EPI_ISL_309467 | A/Penarth/8264/2018                | H3N2 | Positive |
| EPI_ISL_235308 | A/Puno/IPE00792/2011               | H3N2 | Positive |
| EPI_ISL_235305 | A/Masaya/INI00224/2011             | H3N2 | Positive |
| EPI_ISL_9216   | A/Nanjing/28/1984                  | H3N2 | Positive |
| EPI_ISL_90550  | A/California/NHRC0009/2005         | H3N2 | Positive |
| EPI_ISL_62790  | A/Boston/40/2008                   | H3N2 | Positive |
| EPI_ISL_114655 | A/Houston/56829/1992               | H3N2 | Positive |
| EPI_ISL_327722 | A/Abertillery/1971/2018            | H3N2 | Positive |
| EPI_ISL_120410 | A/Malaysia/1959864/2008            | H3N2 | Positive |
| EPI_ISL_33841  | A/Siena/3/1991                     | H3N2 | Positive |
| EPI_ISL_8639   | A/New_York/433/2000                | H3N2 | Positive |
| EPI_ISL_6671   | A/New_York/18/2003                 | H3N2 | Positive |
| EPI_ISL_8972   | A/Nanjing/13/1980                  | H3N2 | Positive |
| EPI_ISL_167928 | A/Hawaii/35/2014                   | H3N2 | Positive |
| EPI_ISL_152841 | A/Peru/PER300/2010                 | H3N2 | Positive |
| EPI_ISL_119710 | A/California/22/2012               | H3N2 | Positive |
| EPI_ISL_189019 | A/Nicaragua/AGA2-30/2011           | H3N2 | Positive |
| EPI_ISL_5481   | A/New_York/764/1993                | H3N2 | Positive |
| EPI_ISL_5664   | A/New_York/773/1993                | H3N2 | Positive |
| EPI_ISL_232044 | A/Ohio/27/2016                     | H3N2 | Positive |
| EPI_ISL_5306   | A/New_York/634/1995                | H3N2 | Positive |
| EPI_ISL_94612  | A/Heilongjiang-Xiangyang/1134/2011 | H3N2 | Positive |
| EPI_ISL_342242 | A/Kansas/07/2019                   | H3N2 | Positive |
| EPI_ISL_9029   | A/Hong_Kong/46/1971                | H3N2 | Positive |
| EPI_ISL_9208   | A/Memphis/2/1977                   | H3N2 | Positive |
| EPI_ISL_127589 | A/Johannesburg/33/1994             | H3N2 | Positive |
| EPI_ISL_294278 | A/Maryland/65/2017                 | H3N2 | Positive |
| EPI_ISL_6978   | A/Albany/2/1970                    | H3N2 | Positive |
| EPI_ISL_77612  | A/California/VRDL328/2009          | H3N2 | Positive |
| EPI_ISL_89636  | A/New_York/3750/2009               | H3N2 | Positive |
| EPI_ISL_114656 | A/Houston/56941/1992               | H3N2 | Positive |
| EPI_ISL_189225 | A/Houston/JMM_98/2012              | H3N2 | Positive |
| EPI_ISL_120417 | A/Malaysia/12106/1997              | H3N2 | Positive |
| EPI_ISL_263140 | A/Canoas/LACENRS-1660/2014         | H3N2 | Positive |
| EPI_ISL_321574 | A/Abertillery/5073/2018            | H3N2 | Positive |
| EPI_ISL_5028   | A/New_York/92/2002                 | H3N2 | Positive |

|                |                                |      |          |
|----------------|--------------------------------|------|----------|
| EPI_ISL_5438   | A/New_York/685/1995            | H3N2 | Positive |
| EPI_ISL_5437   | A/New_York/684/1995            | H3N2 | Positive |
| EPI_ISL_5305   | A/New_York/631/1996            | H3N2 | Positive |
| EPI_ISL_160265 | A/Boston/YGA_00015/2012        | H3N2 | Positive |
| EPI_ISL_6157   | A/Dunedin/1/2002               | H3N2 | Positive |
| EPI_ISL_5406   | A/New_York/693/1995            | H3N2 | Positive |
| EPI_ISL_342951 | A/Bourgogne/1094/2019          | H3N2 | Positive |
| EPI_ISL_173050 | A/Myanmar/13M118/2013          | H3N2 | Positive |
| EPI_ISL_7841   | A/Oregon/UR06-0450/2007        | H3N2 | Positive |
| EPI_ISL_5524   | A/New_York/705/1994            | H3N2 | Positive |
| EPI_ISL_120364 | A/Malaysia/23606/2002          | H3N2 | Positive |
| EPI_ISL_93668  | A/Mexico_City/WRAIR3568N/2010  | H3N2 | Positive |
| EPI_ISL_127601 | A/California/32/1999           | H3N2 | Positive |
| EPI_ISL_234481 | A/Ohio/35/2016                 | H3N2 | Positive |
| EPI_ISL_115041 | A/Enschede/5458/1993           | H3N2 | Positive |
| EPI_ISL_170377 | A/Wisconsin/24/2014            | H3N2 | Positive |
| EPI_ISL_152597 | A/Peru/PER230/2010             | H3N2 | Positive |
| EPI_ISL_5377   | A/New_York/695/1995            | H3N2 | Positive |
| EPI_ISL_263256 | A/Santa_Maria/LACENRS-231/2011 | H3N2 | Positive |
| EPI_ISL_5378   | A/New_York/696/1994            | H3N2 | Positive |
| EPI_ISL_6979   | A/Albany/20/1974               | H3N2 | Positive |
| EPI_ISL_5436   | A/New_York/652/1996            | H3N2 | Positive |
| EPI_ISL_5006   | A/New_York/110/2002            | H3N2 | Positive |
| EPI_ISL_5164   | A/Canterbury/43/2001           | H3N2 | Positive |
| EPI_ISL_114503 | A/Geneva/5366/1991             | H3N2 | Positive |
| EPI_ISL_173307 | A/Vietnam/13V_H3-9/2012        | H3N2 | Positive |
| EPI_ISL_5478   | A/New_York/761/1993            | H3N2 | Positive |
| EPI_ISL_77852  | A/California/VRDL393/2009      | H3N2 | Positive |
| EPI_ISL_27630  | A/Ohio/UR07-0089/2008          | H3N2 | Positive |
| EPI_ISL_29471  | A/Siena/3/1995                 | H3N2 | Positive |
| EPI_ISL_115303 | A/Madrid/G116/1993             | H3N2 | Positive |
| EPI_ISL_29655  | A/Hong_Kong/HKU14/2004         | H3N2 | Positive |
| EPI_ISL_5570   | A/New_York/673/1995            | H3N2 | Positive |
| EPI_ISL_114018 | A/Bilthoven/3895/1977          | H3N2 | Positive |
| EPI_ISL_6982   | A/Albany/6/1970                | H3N2 | Positive |
| EPI_ISL_152265 | A/Peru/PER071/2010             | H3N2 | Positive |
| EPI_ISL_188811 | A/England/575/2014             | H3N2 | Positive |
| EPI_ISL_329981 | A/North_Dakota/19/2017         | H3N2 | Positive |
| EPI_ISL_120353 | A/Malaysia/12990/1997          | H3N2 | Positive |
| EPI_ISL_107487 | A/England/484/2003             | H3N2 | Positive |
| EPI_ISL_9032   | A/Memphis/18/1978              | H3N2 | Positive |
| EPI_ISL_115510 | A/Hong_Kong/49/1995            | H3N2 | Positive |
| EPI_ISL_5176   | A/New_York/574/1996            | H3N2 | Positive |
| EPI_ISL_307665 | A/Newport/8612/2018            | H3N2 | Positive |
| EPI_ISL_83701  | A/Minnesota/11/2010            | H3N2 | Positive |
| EPI_ISL_9040   | A/New_York/535/1998            | H3N2 | Positive |
| EPI_ISL_22616  | A/Hong_Kong/1-9-MA21-3/1968    | H3N2 | Positive |
| EPI_ISL_9287   | A/Canterbury/56/2000           | H3N2 | Positive |
| EPI_ISL_8200   | A/Memphis/59/1999              | H3N2 | Positive |
| EPI_ISL_127613 | A/Wisconsin/03/2007            | H3N2 | Positive |
| EPI_ISL_8176   | A/New_York/336/1999            | H3N2 | Positive |
| EPI_ISL_321587 | A/Aberdare/1604/2018           | H3N2 | Positive |
| EPI_ISL_9209   | A/Memphis/4/1977               | H3N2 | Positive |
| EPI_ISL_113920 | A/Bilthoven/9459/1974          | H3N2 | Positive |
| EPI_ISL_129408 | A/Michigan/19/2012             | H3N2 | Positive |
| EPI_ISL_6191   | A/Western_Australia/43/2003    | H3N2 | Positive |
| EPI_ISL_8954   | A/Hong_Kong/1/1982             | H3N2 | Positive |
| EPI_ISL_142987 | A/Singapore/H2010.797/2010     | H3N2 | Positive |

|                |                                     |      |          |
|----------------|-------------------------------------|------|----------|
| EPI_ISL_114657 | A/Madrid/G58/1992                   | H3N2 | Positive |
| EPI_ISL_327399 | A/Cardiff/8857/2018                 | H3N2 | Positive |
| EPI_ISL_5009   | A/New_York/26/2003                  | H3N2 | Positive |
| EPI_ISL_115463 | A/Hong_Kong/3/1995                  | H3N2 | Positive |
| EPI_ISL_8587   | A/Memphis/109/1972                  | H3N2 | Positive |
| EPI_ISL_90497  | A/Texas/NHRC0001/2005               | H3N2 | Positive |
| EPI_ISL_234473 | A/Michigan/90/2016                  | H3N2 | Positive |
| EPI_ISL_8993   | A/New_York/467/2004                 | H3N2 | Positive |
| EPI_ISL_6858   | A/Wellington/21/2000                | H3N2 | Positive |
| EPI_ISL_195625 | A/Quebec/26-281106/2006             | H3N2 | Positive |
| EPI_ISL_117091 | A/HaNoi/BM766/2003                  | H3N2 | Positive |
| EPI_ISL_115301 | A/Madrid/G101/1993                  | H3N2 | Positive |
| EPI_ISL_7268   | A/Albany/1/1970                     | H3N2 | Positive |
| EPI_ISL_114813 | A/Paris/597/1991                    | H3N2 | Positive |
| EPI_ISL_152819 | A/Peru/PER357/2010                  | H3N2 | Positive |
| EPI_ISL_148000 | A/Boston/DOA2-155/2012              | H3N2 | Positive |
| EPI_ISL_95264  | A/Indiana/08/2011                   | H3N2 | Positive |
| EPI_ISL_8193   | A/New_York/387/2004                 | H3N2 | Positive |
| EPI_ISL_25042  | A/Siena/10/1990                     | H3N2 | Positive |
| EPI_ISL_267075 | A/Texas/105/2017                    | H3N2 | Positive |
| EPI_ISL_115462 | A/Geneva/A9509/1995                 | H3N2 | Positive |
| EPI_ISL_5444   | A/New_York/715/1994                 | H3N2 | Positive |
| EPI_ISL_114457 | A/Wellington/3/1990                 | H3N2 | Positive |
| EPI_ISL_5049   | A/New_York/149/1999                 | H3N2 | Positive |
| EPI_ISL_99417  | A/Indiana/10/2011                   | H3N2 | Positive |
| EPI_ISL_115770 | A/United_Kingdom/261/1991           | H3N2 | Positive |
| EPI_ISL_7269   | A/Albany/3/1970                     | H3N2 | Positive |
| EPI_ISL_114202 | A/Phillipines/2/1982                | H3N2 | Positive |
| EPI_ISL_115565 | A/Hong_Kong/434/1996                | H3N2 | Positive |
| EPI_ISL_202678 | A/Macau/611810/2015                 | H3N2 | Positive |
| EPI_ISL_5514   | A/New_York/655/1994                 | H3N2 | Positive |
| EPI_ISL_113969 | A/Bilthoven/628/1976                | H3N2 | Positive |
| EPI_ISL_117209 | A/HaNoi/BM769/2004                  | H3N2 | Positive |
| EPI_ISL_114348 | A/Netherlands/650/1989              | H3N2 | Positive |
| EPI_ISL_321565 | A/Anglesey/5245/2018                | H3N2 | Positive |
| EPI_ISL_139924 | A/Alaska/02/2013                    | H3N2 | Positive |
| EPI_ISL_327397 | A/Cardiff/8462/2018                 | H3N2 | Positive |
| EPI_ISL_94617  | A/Liaoning-Haizhou/1118/2011        | H3N2 | Positive |
| EPI_ISL_114250 | A/Wellington/4/1985                 | H3N2 | Positive |
| EPI_ISL_321571 | A/Wrexham/9243/2018                 | H3N2 | Positive |
| EPI_ISL_117952 | A/TayNguyen/TN380/2005              | H3N2 | Positive |
| EPI_ISL_294287 | A/Maryland/75/2017                  | H3N2 | Positive |
| EPI_ISL_90470  | A/Missouri/NHRC0001/2000            | H3N2 | Positive |
| EPI_ISL_257203 | A/Saudi_Arabia/20/2015              | H3N2 | Positive |
| EPI_ISL_321570 | A/Wrexham/9057/2018                 | H3N2 | Positive |
| EPI_ISL_274392 | A/London/16U828652-10_S10_L001/2016 | H3N2 | Positive |
| EPI_ISL_5157   | A/New_York/579/1997                 | H3N2 | Positive |
| EPI_ISL_114397 | A/Singapore/35/1989                 | H3N2 | Positive |
| EPI_ISL_5372   | A/Memphis/5/1986                    | H3N2 | Positive |
| EPI_ISL_6216   | A/Western_Australia/73/2005         | H3N2 | Positive |
| EPI_ISL_151    | A/Hong_Kong/1/68                    | H3N2 | Positive |
| EPI_ISL_69818  | A/Victoria/1968                     | H3N2 | Positive |
| EPI_ISL_9039   | A/Nanjing/49/1977                   | H3N2 | Positive |
| EPI_ISL_9034   | A/Memphis/137/1976                  | H3N2 | Positive |
| EPI_ISL_189083 | A/Nicaragua/AGA2-64/2011            | H3N2 | Positive |
| EPI_ISL_114759 | A/Paris/424/1992                    | H3N2 | Positive |
| EPI_ISL_8692   | A/New_York/485/2003                 | H3N2 | Positive |
| EPI_ISL_127587 | A/Shanghai/11/1987                  | H3N2 | Positive |

|                |                                       |      |          |
|----------------|---------------------------------------|------|----------|
| EPI_ISL_107473 | A/England/525/2003                    | H3N2 | Positive |
| EPI_ISL_118214 | A/HaNoi/Q148/2007                     | H3N2 | Positive |
| EPI_ISL_5289   | A/New_York/572/1996                   | H3N2 | Positive |
| EPI_ISL_115040 | A/Akita/4/1993                        | H3N2 | Positive |
| EPI_ISL_6665   | A/New_York/189/1999                   | H3N2 | Positive |
| EPI_ISL_279385 | A/Nicaragua/6585_04/2014              | H3N2 | Positive |
| EPI_ISL_114400 | A/Wellington/5/1989                   | H3N2 | Positive |
| EPI_ISL_5395   | A/Memphis/12/1985                     | H3N2 | Positive |
| EPI_ISL_107296 | A/England/754/2003                    | H3N2 | Positive |
| EPI_ISL_5205   | A/New_York/593/1996                   | H3N2 | Positive |
| EPI_ISL_83687  | A/Jiangxi-Donghu/1682/2010            | H3N2 | Positive |
| EPI_ISL_8104   | A/Udorn/307/1972                      | H3N2 | Positive |
| EPI_ISL_6763   | A/Queensland/53/2005                  | H3N2 | Positive |
| EPI_ISL_158671 | A/Tennessee/F2078/2011                | H3N2 | Positive |
| EPI_ISL_9038   | A/Nanjing/2/1982                      | H3N2 | Positive |
| EPI_ISL_9285   | A/Memphis/15/1988                     | H3N2 | Positive |
| EPI_ISL_145695 | A/Singapore/78L/2007                  | H3N2 | Positive |
| EPI_ISL_114816 | A/South_Australia/27/1992             | H3N2 | Positive |
| EPI_ISL_93640  | A/District_of_Columbia/WRAIR0301/2010 | H3N2 | Positive |
| EPI_ISL_115408 | A/Scotland/142/1993                   | H3N2 | Positive |
| EPI_ISL_5573   | A/New_York/690/1995                   | H3N2 | Positive |
| EPI_ISL_97361  | A/Maine/06/2011                       | H3N2 | Positive |
| EPI_ISL_90491  | A/Missouri/NHRC0001/2006              | H3N2 | Positive |
| EPI_ISL_6705   | A/New_York/66/2003                    | H3N2 | Positive |
| EPI_ISL_9063   | A/Canterbury/390/2003                 | H3N2 | Positive |
| EPI_ISL_177688 | A/Karlstad/3/2015                     | H3N2 | Positive |
| EPI_ISL_5670   | A/New_York/788/1993                   | H3N2 | Positive |
| EPI_ISL_115771 | A/Brisbane/8/1996                     | H3N2 | Positive |
| EPI_ISL_152438 | A/Peru/PER162/2010                    | H3N2 | Positive |
| EPI_ISL_5624   | A/New_York/688/1994                   | H3N2 | Positive |
| EPI_ISL_205392 | A/Thailand/CU-CB166/2014              | H3N2 | Positive |
| EPI_ISL_6166   | A/Wellington/6/2005                   | H3N2 | Positive |
| EPI_ISL_327732 | A/Cardiff/1973/2018                   | H3N2 | Positive |
| EPI_ISL_120334 | A/Malaysia/07145/1995                 | H3N2 | Positive |
| EPI_ISL_5451   | A/New_York/728/1994                   | H3N2 | Positive |
| EPI_ISL_152684 | A/Peru/PER281/2011                    | H3N2 | Positive |
| EPI_ISL_114455 | A/Suita/1/1990                        | H3N2 | Positive |
| EPI_ISL_309457 | A/Neath/9065/2018                     | H3N2 | Positive |
| EPI_ISL_113919 | A/Bilthoven/7398/1974                 | H3N2 | Positive |
| EPI_ISL_5401   | A/New_York/669/1995                   | H3N2 | Positive |
| EPI_ISL_5309   | A/New_York/648/1995                   | H3N2 | Positive |
| EPI_ISL_294276 | A/Maryland/63/2017                    | H3N2 | Positive |
| EPI_ISL_107470 | A/England/788/2003                    | H3N2 | Positive |
| EPI_ISL_321568 | A/Caernarfon/8500/2018                | H3N2 | Positive |
| EPI_ISL_5390   | A/New_York/624/1996                   | H3N2 | Positive |
| EPI_ISL_5711   | A/Wellington/1/2005                   | H3N2 | Positive |
| EPI_ISL_117522 | A/HaNoi/BM544/2004                    | H3N2 | Positive |
| EPI_ISL_5076   | A/New_York/171/1999                   | H3N2 | Positive |
| EPI_ISL_125872 | A/Philippines/2/1982                  | H3N2 | Positive |
| EPI_ISL_114246 | A/Guildford/V728/1985                 | H3N2 | Positive |
| EPI_ISL_29662  | A/Hong_Kong/HKU33/2004                | H3N2 | Positive |
| EPI_ISL_152272 | A/Peru/PER078/2012                    | H3N2 | Positive |
| EPI_ISL_114249 | A/Stockholm/10/1985                   | H3N2 | Positive |
| EPI_ISL_5216   | A/New_York/562/1996                   | H3N2 | Positive |
| EPI_ISL_302456 | A/Carmarthen/5313/2017                | H3N2 | Positive |
| EPI_ISL_176862 | A/Okinawa/14T006/2015                 | H3N2 | Positive |
| EPI_ISL_115566 | A/Lyon/1781/1996                      | H3N2 | Positive |
| EPI_ISL_94642  | A/Heilongjiang-Taoshan/147/2011       | H3N2 | Positive |

|                |                                     |      |          |
|----------------|-------------------------------------|------|----------|
| EPI_ISL_5551   | A/New_York/771/1993                 | H3N2 | Positive |
| EPI_ISL_6659   | A/New_York/59/2003                  | H3N2 | Positive |
| EPI_ISL_20992  | A/New_York/928/2006                 | H3N2 | Positive |
| EPI_ISL_5300   | A/New_York/618/1995                 | H3N2 | Positive |
| EPI_ISL_29483  | A/Hong_Kong/HKU16/2004              | H3N2 | Positive |
| EPI_ISL_110692 | A/Netherlands/217/2003              | H3N2 | Positive |
| EPI_ISL_5482   | A/New_York/765/1993                 | H3N2 | Positive |
| EPI_ISL_321569 | A/Anglesey/8900/2018                | H3N2 | Positive |
| EPI_ISL_114293 | A/Colorado/2/1986                   | H3N2 | Positive |
| EPI_ISL_195626 | A/Quebec/26-191206/2006             | H3N2 | Positive |
| EPI_ISL_9283   | A/Memphis/11/1986                   | H3N2 | Positive |
| EPI_ISL_9095   | A/Canterbury/437/2003               | H3N2 | Positive |
| EPI_ISL_8198   | A/Memphis/66/1986                   | H3N2 | Positive |
| EPI_ISL_118368 | A/HaNoi/TX072/2007                  | H3N2 | Positive |
| EPI_ISL_143054 | A/Singapore/H2010.797/2010          | H3N2 | Positive |
| EPI_ISL_118320 | A/HaNoi/TX022/2007                  | H3N2 | Positive |
| EPI_ISL_274831 | A/London/16U928199-70_S22_L001/2016 | H3N2 | Positive |
| EPI_ISL_8664   | A/New_York/439/2000                 | H3N2 | Positive |
| EPI_ISL_6849   | A/Albany/19/1968                    | H3N2 | Positive |
| EPI_ISL_114196 | A/Rotterdam/8179/1977               | H3N2 | Positive |
| EPI_ISL_108088 | A/Boston/DOA06/2011                 | H3N2 | Positive |
| EPI_ISL_5448   | A/New_York/721/1994                 | H3N2 | Positive |
| EPI_ISL_149718 | A/Stockholm/26/2011                 | H3N2 | Positive |
| EPI_ISL_195622 | A/Quebec/26-310106/2006             | H3N2 | Positive |
| EPI_ISL_195645 | A/Michigan/39/2015                  | H3N2 | Positive |
| EPI_ISL_9145   | A/Memphis/19/1978                   | H3N2 | Positive |
| EPI_ISL_8670   | A/Hong_Kong/6/1985                  | H3N2 | Positive |
| EPI_ISL_9098   | A/Canterbury/440/2003               | H3N2 | Positive |
| EPI_ISL_98696  | A/Hong_Kong/HKU119/2004             | H3N2 | Positive |
| EPI_ISL_124885 | A/Bilthoven/16190/1968              | H3N2 | Positive |
| EPI_ISL_120345 | A/Malaysia/11473/1996               | H3N2 | Positive |
| EPI_ISL_239893 | A/Ontario/RV3236/2016               | H3N2 | Positive |
| EPI_ISL_80059  | A/California/VRDL386/2009           | H3N2 | Positive |
| EPI_ISL_115699 | A/Netherlands/233/1982              | H3N2 | Positive |
| EPI_ISL_8974   | A/Memphis/2/1971                    | H3N2 | Positive |
| EPI_ISL_132408 | A/Mexico/InDRE2112/2005             | H3N2 | Positive |
| EPI_ISL_118107 | A/HungYen/HY6/2007                  | H3N2 | Positive |
| EPI_ISL_29497  | A/Hong_Kong/HKU68/2005              | H3N2 | Positive |
| EPI_ISL_147986 | A/Boston/DOA2-138/2012              | H3N2 | Positive |
| EPI_ISL_90512  | A/Singapore/NHRC0008/2003           | H3N2 | Positive |
| EPI_ISL_114452 | A/Memphis/2/1990                    | H3N2 | Positive |
| EPI_ISL_114869 | A/Stockholm/13/1992                 | H3N2 | Positive |
| EPI_ISL_115354 | A/Netherlands/165/1993              | H3N2 | Positive |
| EPI_ISL_8669   | A/Hong_Kong/14/1974                 | H3N2 | Positive |
| EPI_ISL_8672   | A/Hong_Kong/24/1985                 | H3N2 | Positive |
| EPI_ISL_235299 | A/Puerto_Maldonado/FPM00365/2011    | H3N2 | Positive |
| EPI_ISL_5391   | A/New_York/632/1996                 | H3N2 | Positive |
| EPI_ISL_309455 | A/Swansea/7754/2018                 | H3N2 | Positive |
| EPI_ISL_234469 | A/Michigan/87/2016                  | H3N2 | Positive |
| EPI_ISL_9165   | A/Canterbury/80/2002                | H3N2 | Positive |
| EPI_ISL_20828  | A/Hong_Kong/1-2-MA21-2/1968         | H3N2 | Positive |
| EPI_ISL_309430 | A/Bridgend/4379/2018                | H3N2 | Positive |
| EPI_ISL_937    | A/Leningrad/360/1986                | H3N2 | Positive |
| EPI_ISL_120399 | A/Malaysia/1681079/2006             | H3N2 | Positive |
| EPI_ISL_8987   | A/Hong_Kong/4/1984                  | H3N2 | Positive |
| EPI_ISL_107930 | A/England/484/2003                  | H3N2 | Positive |
| EPI_ISL_114245 | A/Oslo/13676/1983                   | H3N2 | Positive |
| EPI_ISL_327918 | A/Mold/7024/2017                    | H3N2 | Positive |

|                |                               |      |          |
|----------------|-------------------------------|------|----------|
| EPI_ISL_309445 | A/Swansea/5913/2018           | H3N2 | Positive |
| EPI_ISL_6482   | A/Queensland/48/2004          | H3N2 | Positive |
| EPI_ISL_147171 | A/Hong_Kong/JY2/1968          | H3N2 | Positive |
| EPI_ISL_90513  | A/Singapore/NHRC0007/2003     | H3N2 | Positive |
| EPI_ISL_114868 | A/Stockholm/12/1992           | H3N2 | Positive |
| EPI_ISL_8668   | A/Hong_Kong/46/1980           | H3N2 | Positive |
| EPI_ISL_5490   | A/New_York/682/1995           | H3N2 | Positive |
| EPI_ISL_5403   | A/New_York/672/1995           | H3N2 | Positive |
| EPI_ISL_105790 | A/Kunming/1-Va10/2005         | H3N2 | Positive |
| EPI_ISL_5392   | A/New_York/635/1996           | H3N2 | Positive |
| EPI_ISL_9254   | A/Canterbury/38/2000          | H3N2 | Positive |
| EPI_ISL_84455  | A/Netherlands/213/2003        | H3N2 | Positive |
| EPI_ISL_4278   | A/Memphis/2/1990              | H3N2 | Positive |
| EPI_ISL_159598 | A/Iowa/04/2013                | H3N2 | Positive |
| EPI_ISL_7542   | A/Auckland/598/2000           | H3N2 | Positive |
| EPI_ISL_294269 | A/Maryland/55/2017            | H3N2 | Positive |
| EPI_ISL_113966 | A/Bilthoven/2600/1975         | H3N2 | Positive |
| EPI_ISL_115410 | A/Shangdong/9/1993            | H3N2 | Positive |
| EPI_ISL_10115  | A/TW/229/03                   | H3N2 | Positive |
| EPI_ISL_6708   | A/New_York/187/2000           | H3N2 | Positive |
| EPI_ISL_114453 | A/Memphis/5/1990              | H3N2 | Positive |
| EPI_ISL_5178   | A/New_York/580/1996           | H3N2 | Positive |
| EPI_ISL_152    | A/Memphis/1/71                | H3N2 | Positive |
| EPI_ISL_9045   | A/Memphis/3/1973              | H3N2 | Positive |
| EPI_ISL_10116  | A/TW/3286/03                  | H3N2 | Positive |
| EPI_ISL_313954 | A/Neath/7855/2017             | H3N2 | Positive |
| EPI_ISL_6666   | A/New_York/198/2003           | H3N2 | Positive |
| EPI_ISL_6446   | A/New_York/701/1995           | H3N2 | Positive |
| EPI_ISL_129022 | A/Wisconsin/23/2012           | H3N2 | Positive |
| EPI_ISL_173280 | A/Sydney/2/1993               | H3N2 | Positive |
| EPI_ISL_115515 | A/Hong_Kong/42/1996           | H3N2 | Positive |
| EPI_ISL_78573  | A/Peru/WRAIR1508P/2007        | H3N2 | Positive |
| EPI_ISL_152184 | A/Peru/PER041/2011            | H3N2 | Positive |
| EPI_ISL_8588   | A/Memphis/1/1986              | H3N2 | Positive |
| EPI_ISL_176325 | A/Gunma/14G005/2015           | H3N2 | Positive |
| EPI_ISL_115698 | A/Bangkok/1/1979              | H3N2 | Positive |
| EPI_ISL_5476   | A/New_York/759/1993           | H3N2 | Positive |
| EPI_ISL_114559 | A/Lyon/24222/1991             | H3N2 | Positive |
| EPI_ISL_114456 | A/Victoria/2/1990             | H3N2 | Positive |
| EPI_ISL_6863   | A/Queensland/44/2004          | H3N2 | Positive |
| EPI_ISL_5518   | A/New_York/666/1995           | H3N2 | Positive |
| EPI_ISL_102662 | A/Hong_Kong/H090-692-V10/2009 | H3N2 | Positive |
| EPI_ISL_5057   | A/New_York/29/2003            | H3N2 | Positive |
| EPI_ISL_154511 | A/Wisconsin/67/2005           | H3N2 | Positive |
| EPI_ISL_6713   | A/New_York/263/1999           | H3N2 | Positive |
| EPI_ISL_5604   | A/New_York/754/1993           | H3N2 | Positive |
| EPI_ISL_114295 | A/Atlanta/3572/1988           | H3N2 | Positive |
| EPI_ISL_158679 | A/Tennessee/F2084c83/2011     | H3N2 | Positive |
| EPI_ISL_329972 | A/Delaware/33/2017            | H3N2 | Positive |
| EPI_ISL_6205   | A/Western_Australia/58/2004   | H3N2 | Positive |
| EPI_ISL_115355 | A/Netherlands/357/1993        | H3N2 | Positive |
| EPI_ISL_5489   | A/New_York/677/1995           | H3N2 | Positive |
| EPI_ISL_98708  | A/Hong_Kong/HKU104/2005       | H3N2 | Positive |
| EPI_ISL_327405 | A/Cardiff/9548/2018           | H3N2 | Positive |
| EPI_ISL_77624  | A/California/VRDL357/2009     | H3N2 | Positive |
| EPI_ISL_98694  | A/Hong_Kong/HKU121/2004       | H3N2 | Positive |
| EPI_ISL_20814  | A/Hong_Kong/1-1-MA-20E/1968   | H3N2 | Positive |
| EPI_ISL_173301 | A/Vietnam/13V_H3-4/2013       | H3N2 | Positive |

|                |                                |      |          |
|----------------|--------------------------------|------|----------|
| EPI_ISL_115110 | A/Guangdong/25/1993            | H3N2 | Positive |
| EPI_ISL_5041   | A/New_York/87/2002             | H3N2 | Positive |
| EPI_ISL_108258 | A/Boston/DOA85/2011            | H3N2 | Positive |
| EPI_ISL_8699   | A/Hong_Kong/5/83               | H3N2 | Positive |
| EPI_ISL_107710 | A/England/4024313/2003         | H3N2 | Positive |
| EPI_ISL_9205   | A/Canterbury/206/2005          | H3N2 | Positive |
| EPI_ISL_288167 | A/Victoria/5064/2014           | H3N2 | Positive |
| EPI_ISL_5519   | A/New_York/667/1995            | H3N2 | Positive |
| EPI_ISL_115459 | A/Finland/338/1995             | H3N2 | Positive |
| EPI_ISL_173048 | A/Myanmar/13M105/2013          | H3N2 | Positive |
| EPI_ISL_263262 | A/Rio_Grande/LACENRS-3171/2013 | H3N2 | Positive |
| EPI_ISL_6453   | A/Western_Australia/24/2002    | H3N2 | Positive |
| EPI_ISL_27622  | A/Shangdong/9/1993             | H3N2 | Positive |
| EPI_ISL_288370 | A/Victoria/187/2012            | H3N2 | Positive |
| EPI_ISL_8616   | A/Memphis/1/90                 | H3N2 | Positive |
| EPI_ISL_8225   | A/New_York/153/1999            | H3N2 | Positive |
| EPI_ISL_9146   | A/Memphis/4/1980               | H3N2 | Positive |
| EPI_ISL_20831  | A/Hong_Kong/1-5-MA21-2/1968    | H3N2 | Positive |
| EPI_ISL_102700 | A/Hong_Kong/H090-710-V10/2009  | H3N2 | Positive |
| EPI_ISL_115111 | A/Lyon/672/1993                | H3N2 | Positive |
| EPI_ISL_5393   | A/New_York/636/1996            | H3N2 | Positive |
| EPI_ISL_6631   | A/New_York/177/1999            | H3N2 | Positive |
| EPI_ISL_235206 | A/Jakarta/FLUEJKSV0024/2012    | H3N2 | Positive |
| EPI_ISL_94554  | A/Beijing-Xicheng/1293/2011    | H3N2 | Positive |
| EPI_ISL_5303   | A/New_York/625/1996            | H3N2 | Positive |
| EPI_ISL_5001   | A/New_York/47/2003             | H3N2 | Positive |
| EPI_ISL_327694 | A/Cardiff/9945/2018            | H3N2 | Positive |
| EPI_ISL_309447 | A/Pwllheli/5246/2018           | H3N2 | Positive |
| EPI_ISL_120337 | A/Malaysia/10111/1996          | H3N2 | Positive |
| EPI_ISL_195621 | A/Quebec/26-031205/2005        | H3N2 | Positive |
| EPI_ISL_152450 | A/Peru/PER174/2010             | H3N2 | Positive |
| EPI_ISL_113069 | A/Netherlands/312/2003         | H3N2 | Positive |
| EPI_ISL_5394   | A/New_York/641/1996            | H3N2 | Positive |
| EPI_ISL_114556 | A/Lyon/1594/1991               | H3N2 | Positive |
| EPI_ISL_107404 | A/England/539/2003             | H3N2 | Positive |
| EPI_ISL_9051   | A/New_York/214/2003            | H3N2 | Positive |
| EPI_ISL_172633 | A/Myanmar/13M056/2013          | H3N2 | Positive |
| EPI_ISL_115768 | A/Oklahoma/5/1988              | H3N2 | Positive |
| EPI_ISL_76486  | A/Philippines/2-MA/1982        | H3N2 | Positive |
| EPI_ISL_118273 | A/HaNoi/Q769/2007              | H3N2 | Positive |
| EPI_ISL_129616 | A/Indiana/138/2012             | H3N2 | Positive |
| EPI_ISL_309459 | A/Swansea/9391/2018            | H3N2 | Positive |
| EPI_ISL_115412 | A/Yamagata/56/1993             | H3N2 | Positive |
| EPI_ISL_5299   | A/New_York/613/1996            | H3N2 | Positive |
| EPI_ISL_145068 | A/Indiana/11/2013              | H3N2 | Positive |
| EPI_ISL_107618 | A/England/909/2003             | H3N2 | Positive |
| EPI_ISL_8173   | A/New_York/329/1999            | H3N2 | Positive |
| EPI_ISL_8985   | A/Hong_Kong/50/1972            | H3N2 | Positive |
| EPI_ISL_132417 | A/Mexico/InDRE835/2003         | H3N2 | Positive |
| EPI_ISL_152259 | A/Peru/PER065/2010             | H3N2 | Positive |
| EPI_ISL_114345 | A/Atlanta/211/1989             | H3N2 | Positive |
| EPI_ISL_66096  | A/England/72                   | H3N2 | Positive |
| EPI_ISL_5409   | A/Waikato/1/2000               | H3N2 | Positive |
| EPI_ISL_5485   | A/New_York/639/1995            | H3N2 | Positive |
| EPI_ISL_129196 | A/Boston/DOA94/2012            | H3N2 | Positive |
| EPI_ISL_129418 | A/Indiana/147/2012             | H3N2 | Positive |
| EPI_ISL_232048 | A/Michigan/83/2016             | H3N2 | Positive |
| EPI_ISL_3767   | A/Wyoming/03/2003              | H3N2 | Positive |

|                |                                  |      |          |
|----------------|----------------------------------|------|----------|
| EPI_ISL_115414 | A/Hong_Kong/56/1994              | H3N2 | Positive |
| EPI_ISL_9050   | A/Nanjing/36/1983                | H3N2 | Positive |
| EPI_ISL_235232 | A/Moscow/1514A00504307T_CP2/2011 | H3N2 | Positive |
| EPI_ISL_6527   | A/Queensland/42/2004             | H3N2 | Positive |
| EPI_ISL_5037   | A/New_York/22/2003               | H3N2 | Positive |
| EPI_ISL_5398   | A/New_York/659/1994              | H3N2 | Positive |
| EPI_ISL_125877 | A/Sichuan/2/1987                 | H3N2 | Positive |
| EPI_ISL_250205 | A/Nevada/20/2014                 | H3N2 | Positive |
| EPI_ISL_111020 | A/Madrid/G102/1993               | H3N2 | Positive |
| EPI_ISL_114297 | A/Netherlands/450/1988           | H3N2 | Positive |
| EPI_ISL_7634   | A/New_York/UR06-0510/2007        | H3N2 | Positive |
| EPI_ISL_5520   | A/New_York/668/1995              | H3N2 | Positive |
| EPI_ISL_114873 | A/Victoria/68/1992               | H3N2 | Positive |
| EPI_ISL_6156   | A/New_York/737/1994              | H3N2 | Positive |
| EPI_ISL_102623 | A/Hong_Kong/H090-671-V10/2009    | H3N2 | Positive |
| EPI_ISL_120377 | A/Malaysia/29197/2004            | H3N2 | Positive |
| EPI_ISL_5290   | A/New_York/578/1996              | H3N2 | Positive |
| EPI_ISL_113037 | A/Bilthoven/21801/1971           | H3N2 | Positive |
| EPI_ISL_5337   | A/New_York/733/1994              | H3N2 | Positive |
| EPI_ISL_120356 | A/Malaysia/13246/1997            | H3N2 | Positive |
| EPI_ISL_118540 | A/Boston/DOA16/2011              | H3N2 | Positive |
| EPI_ISL_90539  | A/California/NHRC0006/2003       | H3N2 | Positive |
| EPI_ISL_90541  | A/Singapore/NHRC0004/2003        | H3N2 | Positive |
| EPI_ISL_5002   | A/New_York/48/2003               | H3N2 | Positive |
| EPI_ISL_114298 | A/Stockholm/12/1988              | H3N2 | Positive |
| EPI_ISL_29651  | A/Hong_Kong/HKU6/2004            | H3N2 | Positive |
| EPI_ISL_107697 | A/England/602/2003               | H3N2 | Positive |
| EPI_ISL_152751 | A/Peru/PER317/2010               | H3N2 | Positive |
| EPI_ISL_263302 | A/Porto_Alegre/LACENRS-921/2015  | H3N2 | Positive |
| EPI_ISL_6641   | A/New_York/141/1999              | H3N2 | Positive |
| EPI_ISL_5683   | A/New_York/3/2006                | H3N2 | Positive |
| EPI_ISL_25041  | A/Siena/4/1990                   | H3N2 | Positive |
| EPI_ISL_8169   | A/New_York/320/1999              | H3N2 | Positive |
| EPI_ISL_66170  | A/Thailand/CU-B657/2009          | H3N2 | Positive |
| EPI_ISL_5152   | A/New_York/565/1996              | H3N2 | Positive |
| EPI_ISL_114017 | A/Amsterdam/1609/1977            | H3N2 | Positive |
| EPI_ISL_10119  | A/TW/875/04                      | H3N2 | Positive |
| EPI_ISL_5522   | A/New_York/691/1995              | H3N2 | Positive |
| EPI_ISL_129428 | A/Ohio/57/2012                   | H3N2 | Positive |
| EPI_ISL_129552 | A/Indiana/115/2012               | H3N2 | Positive |
| EPI_ISL_113967 | A/Bilthoven/2813/1975            | H3N2 | Positive |
| EPI_ISL_152496 | A/Peru/PER399/2012               | H3N2 | Positive |
| EPI_ISL_5396   | A/New_York/654/1994              | H3N2 | Positive |
| EPI_ISL_114201 | A/Netherlands/241/1982           | H3N2 | Positive |
| EPI_ISL_114399 | A/Victoria/1/1989                | H3N2 | Positive |
| EPI_ISL_5580   | A/New_York/736/1994              | H3N2 | Positive |
| EPI_ISL_114197 | A/Texas/1/1977                   | H3N2 | Positive |
| EPI_ISL_8674   | A/Hong_Kong/7/1985               | H3N2 | Positive |
| EPI_ISL_113916 | A/Port_Chalmers/1/1973           | H3N2 | Positive |
| EPI_ISL_309469 | A/Cardiff/8360/2018              | H3N2 | Positive |
| EPI_ISL_94618  | A/Liaoning-Tiedong/1153/2011     | H3N2 | Positive |
| EPI_ISL_327400 | A/Penarth/8862/2018              | H3N2 | Positive |
| EPI_ISL_189629 | A/Houston/JMM_166/2013           | H3N2 | Positive |
| EPI_ISL_94555  | A/Beijing-Xicheng/1409/2011      | H3N2 | Positive |
| EPI_ISL_117162 | A/HaNoi/662/2004                 | H3N2 | Positive |
| EPI_ISL_10112  | A/TW/872/02                      | H3N2 | Positive |
| EPI_ISL_176850 | A/Lebanon/14L78/2014             | H3N2 | Positive |
| EPI_ISL_117093 | A/HaNoi/BM767/2003               | H3N2 | Positive |

|                |                                          |      |          |
|----------------|------------------------------------------|------|----------|
| EPI_ISL_143165 | A/Victoria/JY2/1968                      | H3N2 | Positive |
| EPI_ISL_5622   | A/New_York/660/1995                      | H3N2 | Positive |
| EPI_ISL_114398 | A/Singapore/40/1989                      | H3N2 | Positive |
| EPI_ISL_132418 | A/Mexico/InDRE940/2003                   | H3N2 | Positive |
| EPI_ISL_173279 | A/Victoria/186/1982                      | H3N2 | Positive |
| EPI_ISL_114504 | A/Lyon/1149/1991                         | H3N2 | Positive |
| EPI_ISL_9171   | A/Canterbury/409/2003                    | H3N2 | Positive |
| EPI_ISL_7037   | A/Memphis/3/1971                         | H3N2 | Positive |
| EPI_ISL_6202   | A/Western_Australia/55/2004              | H3N2 | Positive |
| EPI_ISL_189227 | A/Houston/JMM_101/2013                   | H3N2 | Positive |
| EPI_ISL_5440   | A/New_York/689/1995                      | H3N2 | Positive |
| EPI_ISL_2466   | A/Hong_Kong/1774/99                      | H3N2 | Positive |
| EPI_ISL_67253  | A/New_York/2/2003                        | H3N2 | Positive |
| EPI_ISL_8984   | A/Hong_Kong/3/1969                       | H3N2 | Positive |
| EPI_ISL_8599   | A/Christchurch/15/2004                   | H3N2 | Positive |
| EPI_ISL_9246   | A/Canterbury/238/2005                    | H3N2 | Positive |
| EPI_ISL_98699  | A/Hong_Kong/HKU116/2004                  | H3N2 | Positive |
| EPI_ISL_277241 | A/Ohio/22/2017                           | H3N2 | Positive |
| EPI_ISL_309465 | A/Newport/8717/2018                      | H3N2 | Positive |
| EPI_ISL_263156 | A/Frederico_Westphalen/LACENRS-2130/2012 | H3N2 | Positive |
| EPI_ISL_5441   | A/New_York/709/1994                      | H3N2 | Positive |
| EPI_ISL_128152 | A/Indiana/59/2012                        | H3N2 | Positive |
| EPI_ISL_5294   | A/New_York/608/1996                      | H3N2 | Positive |
| EPI_ISL_6896   | A/Albany/3/1967                          | H2N2 | Positive |
| EPI_ISL_170560 | A/Shanghai/202/1957                      | H2N2 | Positive |
| EPI_ISL_22830  | A/Singapore/1-MA12D/1957                 | H2N2 | Positive |
| EPI_ISL_19666  | A/Cottbus/1/1964                         | H2N2 | Positive |
| EPI_ISL_170557 | A/Georgia/1/1963                         | H2N2 | Positive |
| EPI_ISL_235    | A/Berkeley/1/1968                        | H2N2 | Positive |
| EPI_ISL_130363 | A/Cornell/1001/1967                      | H2N2 | Positive |
| EPI_ISL_169836 | A/Leningrad/134/17/57                    | H2N2 | Positive |
| EPI_ISL_130408 | A/ITS/1/1957                             | H2N2 | Positive |
| EPI_ISL_6895   | A/Albany/7/1967                          | H2N2 | Positive |
| EPI_ISL_19664  | A/Berlin/3/1964                          | H2N2 | Positive |
| EPI_ISL_170556 | A/Beijing/12/1964                        | H2N2 | Positive |
| EPI_ISL_7062   | A/Albany/1/1958                          | H2N2 | Positive |
| EPI_ISL_19668  | A/Tashkent/1046/1967                     | H2N2 | Positive |
| EPI_ISL_130402 | A/Montevideo/2208/1967                   | H2N2 | Positive |
| EPI_ISL_7061   | A/Albany/22/1957                         | H2N2 | Positive |
| EPI_ISL_170559 | A/Leningrad/29/1963                      | H2N2 | Positive |
| EPI_ISL_7076   | A/Albany/1/1960                          | H2N2 | Positive |
| EPI_ISL_84895  | A/Netherlands/056H1/1960                 | H2N2 | Positive |
| EPI_ISL_27595  | A/Korea/426/1968                         | H2N2 | Positive |
| EPI_ISL_6894   | A/Albany/6/1967                          | H2N2 | Positive |
| EPI_ISL_8314   | A/Canada/720/05                          | H2N2 | Positive |
| EPI_ISL_7082   | A/Albany/4/1967                          | H2N2 | Positive |
| EPI_ISL_130406 | A/England/1/1961                         | H2N2 | Positive |
| EPI_ISL_3294   | A/Korea/426/68                           | H2N2 | Positive |
| EPI_ISL_130405 | A/Korea/426/1968                         | H2N2 | Positive |
| EPI_ISL_6893   | A/Albany/26/1957                         | H2N2 | Positive |
| EPI_ISL_25025  | A/Netherlands/56/1963                    | H2N2 | Positive |
| EPI_ISL_19669  | A/Johannesburg/617/1967                  | H2N2 | Positive |
| EPI_ISL_6913   | A/Albany/8/1967                          | H2N2 | Positive |
| EPI_ISL_6912   | A/Albany/1/1959                          | H2N2 | Positive |
| EPI_ISL_130404 | A/Ann_Arbor/7/1967                       | H2N2 | Positive |
| EPI_ISL_182214 | A/Victoria/5/1968                        | H2N2 | Positive |
| EPI_ISL_6971   | A/Albany/1/1968                          | H2N2 | Positive |
| EPI_ISL_166563 | A/Netherlands/B1/1968                    | H2N2 | Positive |

|                |                                 |      |          |
|----------------|---------------------------------|------|----------|
| EPI_ISL_19665  | A/Potsdam/2/1965                | H2N2 | Positive |
| EPI_ISL_25007  | A/Czech_Republic/1/1966         | H2N2 | Positive |
| EPI_ISL_19667  | A/Guiyang/1/1957                | H2N2 | Positive |
| EPI_ISL_6897   | A/Albany/2/1968                 | H2N2 | Positive |
| EPI_ISL_69298  | A/North_Carolina/1/1963         | H2N2 | Positive |
| EPI_ISL_6910   | A/Albany/9/1967                 | H2N2 | Positive |
| EPI_ISL_221825 | A/Minnesota/45/2016             | H1N2 | Positive |
| EPI_ISL_330080 | A/Colorado/16/2017              | H1N2 | Positive |
| EPI_ISL_320688 | A/Ohio/24/2018                  | H1N2 | Positive |
| EPI_ISL_320690 | A/Michigan/383/2018             | H1N2 | Positive |
| EPI_ISL_320689 | A/California/58/2018            | H1N2 | Positive |
| EPI_ISL_99810  | A/Minnesota/19/2011             | H1N2 | Positive |
| EPI_ISL_329967 | A/Ohio/25/2018                  | H1N2 | Positive |
| EPI_ISL_8702   | A/New_York/400/2003             | H1N2 | Positive |
| EPI_ISL_329970 | A/Ohio/28/2018                  | H1N2 | Positive |
| EPI_ISL_8694   | A/New_York/489/2003             | H1N2 | Positive |
| EPI_ISL_329968 | A/California/62/2018            | H1N2 | Positive |
| EPI_ISL_329969 | A/California/63/2018            | H1N2 | Positive |
| EPI_ISL_230638 | A/Minnesota/70/2016             | H1N2 | Positive |
| EPI_ISL_30055  | A/Michigan/09/2007              | H1N2 | Positive |
| EPI_ISL_238918 | A/Iowa/32/2016                  | H1N2 | Positive |
| EPI_ISL_230639 | A/Wisconsin/71/2016             | H1N2 | Positive |
| EPI_ISL_6423   | A/New_York/C1/2003              | H1N2 | Positive |
| EPI_ISL_126260 | A/Minnesota/19/2011             | H1N2 | Positive |
| EPI_ISL_129684 | A/Minnesota/14/2012             | H1N2 | Positive |
| EPI_ISL_277244 | A/Ohio/35/2017                  | H1N2 | Positive |
| EPI_ISL_320686 | A/Michigan/382/2018             | H1N2 | Positive |
| EPI_ISL_320687 | A/Michigan/384/2018             | H1N2 | Positive |
| EPI_ISL_277243 | A/Ohio/24/2017                  | H1N2 | Positive |
| EPI_ISL_304183 | A/Netherlands/10407/2018        | H1N2 | Positive |
| EPI_ISL_126261 | A/Michigan/09/2007              | H1N2 | Positive |
| EPI_ISL_6746   | A/New_York/78/2002              | H1N2 | Positive |
| EPI_ISL_7889   | A/California/UR06-0585/2007     | H1N1 | Positive |
| EPI_ISL_69297  | A/New_Jersey/1976               | H1N1 | Positive |
| EPI_ISL_10251  | A/Taiwan/01/1986                | H1N1 | Positive |
| EPI_ISL_179403 | A/Ohio/09/2015                  | H1N1 | Positive |
| EPI_ISL_27598  | A/Siena/14/1995                 | H1N1 | Positive |
| EPI_ISL_7819   | A/Kentucky/UR06-0027/2007       | H1N1 | Positive |
| EPI_ISL_33556  | A/Yangon/M285/2008              | H1N1 | Positive |
| EPI_ISL_69244  | A/AA/Huston/1945                | H1N1 | Positive |
| EPI_ISL_70158  | A/Gunma/07G006/2008             | H1N1 | Positive |
| EPI_ISL_167572 | A/Helsinki/743M/2014            | H1N1 | Positive |
| EPI_ISL_7881   | A/North_Carolina/UR06-0011/2006 | H1N1 | Positive |
| EPI_ISL_143168 | A/Bellamy/JY2/1942              | H1N1 | Positive |
| EPI_ISL_123187 | A/Christchurch/4/2001           | H1N1 | Positive |
| EPI_ISL_151784 | A/Singapore/30L/2007            | H1N1 | Positive |
| EPI_ISL_6509   | A/South_Australia/30/2000       | H1N1 | Positive |
| EPI_ISL_129179 | A/Missouri/12/2012              | H1N1 | Positive |
| EPI_ISL_70176  | A/Niigata/08F093/2009           | H1N1 | Positive |
| EPI_ISL_93599  | A/Taiwan/6723/2008              | H1N1 | Positive |
| EPI_ISL_69245  | A/AA/Marton/1943                | H1N1 | Positive |
| EPI_ISL_69300  | A/Phila/1935                    | H1N1 | Positive |
| EPI_ISL_6367   | A/South_Australia/45/2000       | H1N1 | Positive |
| EPI_ISL_87220  | A/Boston/58/2009                | H1N1 | Positive |
| EPI_ISL_5319   | A/New_York/653/1996             | H1N1 | Positive |
| EPI_ISL_145699 | A/Singapore/49O/2007            | H1N1 | Positive |
| EPI_ISL_63397  | A/South_Korea/AF10/2008         | H1N1 | Positive |
| EPI_ISL_69296  | A/New_Jersey/11/1976            | H1N1 | Positive |

|                |                                     |      |          |
|----------------|-------------------------------------|------|----------|
| EPI_ISL_8264   | A/New_York/233/2000                 | H1N1 | Positive |
| EPI_ISL_7983   | A/Oklahoma/UR06-0241/2007           | H1N1 | Positive |
| EPI_ISL_7789   | A/Albany/8/1979                     | H1N1 | Positive |
| EPI_ISL_5278   | A/New_York/607/1995                 | H1N1 | Positive |
| EPI_ISL_71056  | A/Saskatchewan/5131/2009            | H1N1 | Positive |
| EPI_ISL_123173 | A/Florida/2/1993                    | H1N1 | Positive |
| EPI_ISL_7823   | A/Vermont/UR06-0035/2007            | H1N1 | Positive |
| EPI_ISL_87190  | A/Boston/18/2009                    | H1N1 | Positive |
| EPI_ISL_132867 | A/New_Jersey/8/1976                 | H1N1 | Positive |
| EPI_ISL_6836   | A/Memphis/54/1983                   | H1N1 | Positive |
| EPI_ISL_176752 | A/Ulaanbaatar/1735/2009             | H1N1 | Positive |
| EPI_ISL_6905   | A/Singapore/6/1986                  | H1N1 | Positive |
| EPI_ISL_80810  | A/California/VRDL270/2009           | H1N1 | Positive |
| EPI_ISL_7944   | A/Virginia/UR06-0562/2007           | H1N1 | Positive |
| EPI_ISL_84910  | A/Liverpool/1951                    | H1N1 | Positive |
| EPI_ISL_87215  | A/Boston/45/2009                    | H1N1 | Positive |
| EPI_ISL_27596  | A/Siena/10/1989                     | H1N1 | Positive |
| EPI_ISL_7918   | A/Ohio/UR06-0121/2007               | H1N1 | Positive |
| EPI_ISL_69268  | A/Hickox/1940                       | H1N1 | Positive |
| EPI_ISL_7800   | A/Texas/UR06-0468/2007              | H1N1 | Positive |
| EPI_ISL_120421 | A/Malaysia/14817/1997               | H1N1 | Positive |
| EPI_ISL_146761 | A/Arkansas/14/2013                  | H1N1 | Positive |
| EPI_ISL_6410   | A/Nanchang/14/1996                  | H1N1 | Positive |
| EPI_ISL_120422 | A/Malaysia/15042/1998               | H1N1 | Positive |
| EPI_ISL_70160  | A/Hokkaido/07H007/2007              | H1N1 | Positive |
| EPI_ISL_5169   | A/FortMonmouth/1/1947               | H1N1 | Positive |
| EPI_ISL_7808   | A/Texas/UR06-0397/2007              | H1N1 | Positive |
| EPI_ISL_149433 | A/Iowa/02/2009                      | H1N1 | Positive |
| EPI_ISL_6436   | A/Memphis/27/1983                   | H1N1 | Positive |
| EPI_ISL_5277   | A/New_York/605/1995                 | H1N1 | Positive |
| EPI_ISL_7788   | A/Texas/UR06-0270/2007              | H1N1 | Positive |
| EPI_ISL_7982   | A/Oregon/UR06-0185/2007             | H1N1 | Positive |
| EPI_ISL_8030   | A/Illinois/UR06-0096/2007           | H1N1 | Positive |
| EPI_ISL_156327 | A/New_Zealand/1212d/2009            | H1N1 | Positive |
| EPI_ISL_5261   | A/Baylor/11515/1982                 | H1N1 | Positive |
| EPI_ISL_149430 | A/Arkansas/15/2013                  | H1N1 | Positive |
| EPI_ISL_5323   | A/Memphis/11/1978                   | H1N1 | Positive |
| EPI_ISL_6837   | A/Memphis/3/1987                    | H1N1 | Positive |
| EPI_ISL_6974   | A/Malaya/302/1954                   | H1N1 | Positive |
| EPI_ISL_5276   | A/New_York/604/1995                 | H1N1 | Positive |
| EPI_ISL_7947   | A/Kentucky/UR06-0449/2007           | H1N1 | Positive |
| EPI_ISL_181326 | A/Singapore/44T/2007                | H1N1 | Positive |
| EPI_ISL_329966 | A/Iowa/33/2017                      | H1N1 | Positive |
| EPI_ISL_147188 | A/Fort_Monmouth/1-JY2/1947          | H1N1 | Positive |
| EPI_ISL_120445 | A/Malaysia/1823766/2007             | H1N1 | Positive |
| EPI_ISL_181327 | A/Singapore/86D/2007                | H1N1 | Positive |
| EPI_ISL_85201  | A/Switzerland/5165/2010             | H1N1 | Positive |
| EPI_ISL_5566   | A/New_York/642/1995                 | H1N1 | Positive |
| EPI_ISL_5569   | A/Memphis/2/1983                    | H1N1 | Positive |
| EPI_ISL_120419 | A/Malaysia/14075/1997               | H1N1 | Positive |
| EPI_ISL_5565   | A/New_York/630/1995                 | H1N1 | Positive |
| EPI_ISL_6456   | A/South_Australia/26/2000           | H1N1 | Positive |
| EPI_ISL_5568   | A/Memphis/1/1983                    | H1N1 | Positive |
| EPI_ISL_143167 | A/Malaysia/JY2/1954                 | H1N1 | Positive |
| EPI_ISL_5433   | A/New_York/626/1996                 | H1N1 | Positive |
| EPI_ISL_100054 | A/Wisconsin/28/2011                 | H1N1 | Positive |
| EPI_ISL_106561 | A/Hanoi/BM959/2003                  | H1N1 | Positive |
| EPI_ISL_138290 | A/Hebei-Yuhua/SWL1250/2012_(H1N1v)_ | H1N1 | Positive |

|                |                               |      |          |
|----------------|-------------------------------|------|----------|
| EPI_ISL_202952 | A/Minnesota/46/2015           | H1N1 | Positive |
| EPI_ISL_124309 | A/England/192/2000            | H1N1 | Positive |
| EPI_ISL_99209  | A/Philippines/WRAIR1736P/2006 | H1N1 | Positive |
| EPI_ISL_99217  | A/Maracay/WRAIR1729P/2008     | H1N1 | Positive |
| EPI_ISL_143164 | A/Denver/JY2/1957             | H1N1 | Positive |
| EPI_ISL_5279   | A/New_York/615/1995           | H1N1 | Positive |
| EPI_ISL_6880   | A/Memphis/1/2001              | H1N1 | Positive |
| EPI_ISL_83267  | A/Illinois/09/2007            | H1N1 | Positive |
| EPI_ISL_154493 | A/Brisbane/59/2007            | H1N1 | Positive |
| EPI_ISL_6775   | A/Memphis/2/1996              | H1N1 | Positive |
| EPI_ISL_7591   | A/Kentucky/UR06-0042/2007     | H1N1 | Positive |
| EPI_ISL_106498 | A/HaNoi/ARI36/2003            | H1N1 | Positive |
| EPI_ISL_85649  | A/Jiangsu/1/2011              | H1N1 | Positive |
| EPI_ISL_106712 | A/DaNang/DN365/2008           | H1N1 | Positive |
| EPI_ISL_106578 | A/HaNoi/HN603/2003            | H1N1 | Positive |
| EPI_ISL_5170   | A/Baylor/11735/1982           | H1N1 | Positive |
| EPI_ISL_123154 | A/Nanchang/16A/1999           | H1N1 | Positive |
| EPI_ISL_134468 | A/SOUTH_AUSTRALIA/162/2012    | H1N1 | Positive |
| EPI_ISL_7804   | A/California/UR06-0302/2007   | H1N1 | Positive |
| EPI_ISL_123180 | A/New_Caledonia/20/99         | H1N1 | Positive |
| EPI_ISL_7600   | A/Illinois/UR06-0248/2007     | H1N1 | Positive |
| EPI_ISL_7063   | A/Albany/12/1951              | H1N1 | Positive |
| EPI_ISL_87225  | A/Boston/65/2009              | H1N1 | Positive |
| EPI_ISL_6461   | A/Memphis/21/1983             | H1N1 | Positive |
| EPI_ISL_130407 | A/Kw/1/1957                   | H1N1 | Positive |
| EPI_ISL_66092  | A/Bel/1942                    | H1N1 | Positive |
| EPI_ISL_179404 | A/Ohio/09/2015                | H1N1 | Positive |
| EPI_ISL_147193 | A/Texas/36-JY2/1991           | H1N1 | Positive |
| EPI_ISL_7780   | A/Texas/UR06-0542/2007        | H1N1 | Positive |
| EPI_ISL_70168  | A/Nagasaki/07N011/2008        | H1N1 | Positive |
| EPI_ISL_30054  | A/Ohio/02/2007                | H1N1 | Positive |
| EPI_ISL_70157  | A/Gunma/07G002/2008           | H1N1 | Positive |
| EPI_ISL_5282   | A/New_York/621/1995           | H1N1 | Positive |
| EPI_ISL_7973   | A/Texas/UR06-0503/2007        | H1N1 | Positive |
| EPI_ISL_5534   | A/Wellington/16/2000          | H1N1 | Positive |
| EPI_ISL_71058  | A/Saskatchewan/5351/2009      | H1N1 | Positive |
| EPI_ISL_5370   | A/New_York/645/1995           | H1N1 | Positive |
| EPI_ISL_7073   | A/USSR/46/1979                | H1N1 | Positive |
| EPI_ISL_7873   | A/Oregon/UR06-0230/2007       | H1N1 | Positive |
| EPI_ISL_156325 | A/New_Zealand/1212b/2009      | H1N1 | Positive |
| EPI_ISL_5692   | A/New_York/616/1995           | H1N1 | Positive |
| EPI_ISL_5269   | A/Canterbury/65/2001          | H1N1 | Positive |
| EPI_ISL_106752 | A/Hue/H259/2008               | H1N1 | Positive |
| EPI_ISL_123155 | A/Kawasaki/6/1986             | H1N1 | Positive |
| EPI_ISL_173276 | A/Victoria/1/1991             | H1N1 | Positive |
| EPI_ISL_156330 | A/New_Zealand/1212e/2009      | H1N1 | Positive |
| EPI_ISL_345606 | A/Franche_Comte/1390/2019     | H1N1 | Positive |
| EPI_ISL_66094  | A/Denver/57                   | H1N1 | Positive |
| EPI_ISL_8078   | A/California/45/1978          | H1N1 | Positive |
| EPI_ISL_6776   | A/Memphis/3/1996              | H1N1 | Positive |
| EPI_ISL_7050   | A/California/10/1978          | H1N1 | Positive |
| EPI_ISL_5619   | A/New_York/646/1996           | H1N1 | Positive |
| EPI_ISL_147189 | A/Cameron/JY2/1946            | H1N1 | Positive |
| EPI_ISL_7072   | A/Albany/1618/1951            | H1N1 | Positive |
| EPI_ISL_106711 | A/DaNang/DN364/2008           | H1N1 | Positive |
| EPI_ISL_83885  | A/SYDNEY/217/2010             | H1N1 | Positive |
| EPI_ISL_147187 | A/Fort_Warren/50-JY2/1950     | H1N1 | Positive |
| EPI_ISL_309431 | A/Swansea/4496/2018           | H1N1 | Positive |

|                |                                |      |          |
|----------------|--------------------------------|------|----------|
| EPI_ISL_279682 | A/Bayern/7/1995                | H1N1 | Positive |
| EPI_ISL_5618   | A/New_York/643/1995            | H1N1 | Positive |
| EPI_ISL_69267  | A/Henry/1936                   | H1N1 | Positive |
| EPI_ISL_8015   | A/Texas/UR06-0420/2007         | H1N1 | Positive |
| EPI_ISL_7957   | A/Virginia/UR06-0114/2007      | H1N1 | Positive |
| EPI_ISL_7084   | A/Albany/14/1951               | H1N1 | Positive |
| EPI_ISL_147168 | A/New_Jersey/Swiss/1976        | H1N1 | Positive |
| EPI_ISL_106730 | A/DaNang/DN432/2008            | H1N1 | Positive |
| EPI_ISL_148286 | A/Jiangsu/1/2011               | H1N1 | Positive |
| EPI_ISL_8014   | A/Oregon/UR06-0219/2007        | H1N1 | Positive |
| EPI_ISL_147169 | A/New_Jersey/Wistar/1976       | H1N1 | Positive |
| EPI_ISL_7093   | A/Albany/13/1951               | H1N1 | Positive |
| EPI_ISL_71057  | A/Saskatchewan/5350/2009       | H1N1 | Positive |
| EPI_ISL_6768   | A/Memphis/41/1983              | H1N1 | Positive |
| EPI_ISL_33559  | A/Naypyitaw/M783/2008          | H1N1 | Positive |
| EPI_ISL_294141 | A/Paris/320/2018               | H1N1 | Positive |
| EPI_ISL_66099  | A/Fort_Worth/50                | H1N1 | Positive |
| EPI_ISL_252683 | A/Pavia/65/2016                | H1N1 | Positive |
| EPI_ISL_143169 | A/Hickox/JY2/1940              | H1N1 | Positive |
| EPI_ISL_173282 | A/Victoria/4/1986              | H1N1 | Positive |
| EPI_ISL_5621   | A/New_York/656/1995            | H1N1 | Positive |
| EPI_ISL_7052   | A/New_York/2924-1/1986         | H1N1 | Positive |
| EPI_ISL_6853   | A/Albany/4835/1948             | H1N1 | Positive |
| EPI_ISL_6404   | A/New_York/633/1995            | H1N1 | Positive |
| EPI_ISL_123156 | A/Victoria/36/1988             | H1N1 | Positive |
| EPI_ISL_6914   | A/Texas/2922-3/1986            | H1N1 | Positive |
| EPI_ISL_123176 | A/Johannesburg/159/1997        | H1N1 | Positive |
| EPI_ISL_5317   | A/New_York/638/1995            | H1N1 | Positive |
| EPI_ISL_153533 | A/Zhejiang/KLED-568/2013(H1N1) | H1N1 | Positive |
| EPI_ISL_7048   | A/Albany/4836/1950             | H1N1 | Positive |
| EPI_ISL_7608   | A/Kentucky/UR06-0188/2007      | H1N1 | Positive |
| EPI_ISL_66101  | A/Malaysia/54                  | H1N1 | Positive |
| EPI_ISL_10111  | A/TW/130/96                    | H1N1 | Positive |
| EPI_ISL_69277  | A/Iowa/1943                    | H1N1 | Positive |
| EPI_ISL_7992   | A/Kentucky/UR06-0046/2007      | H1N1 | Positive |
| EPI_ISL_22625  | A/Beijing/262/1995             | H1N1 | Positive |
| EPI_ISL_173283 | A/Perth/5/1995                 | H1N1 | Positive |
| EPI_ISL_6833   | A/Memphis/1/1979               | H1N1 | Positive |
| EPI_ISL_7054   | A/South_Australia/44/2000      | H1N1 | Positive |
| EPI_ISL_30053  | A/Ohio/01/2007                 | H1N1 | Positive |
| EPI_ISL_120438 | A/Malaysia/1718958/2007        | H1N1 | Positive |
| EPI_ISL_123175 | A/Shanghai/8/1996              | H1N1 | Positive |
| EPI_ISL_7585   | A/Texas/UR06-0467/2007         | H1N1 | Positive |
| EPI_ISL_6774   | A/Memphis/12/1986              | H1N1 | Positive |
| EPI_ISL_123174 | A/Shengzhen/227/1995           | H1N1 | Positive |
| EPI_ISL_33557  | A/Naypyitaw/M499/2008          | H1N1 | Positive |
| EPI_ISL_99227  | A/Piura/WRAIR1699P/2008        | H1N1 | Positive |
